# Modeling behaviorally relevant neural dynamics enabled by preferential subspace identification (PSID)

Omid G. Sani<sup>1</sup>, Bijan Pesaran<sup>2</sup>, Maryam M. Shanechi<sup>1,3\*</sup>

<sup>1</sup> Ming Hsieh Department of Electrical Engineering, Viterbi School of Engineering, University of Southern California, Los Angeles, California, USA

<sup>2</sup> Center for Neural Science, New York University, New York City, New York, USA

<sup>3</sup> Neuroscience Graduate Program, University of Southern California, Los Angeles, California, USA

\*Corresponding author: shanechi@usc.edu

## Abstract

Neural activity exhibits dynamics that in addition to a behavior of interest also relate to other brain functions or internal states. Understanding how neural dynamics explain behavior requires dissociating behaviorally relevant and irrelevant dynamics, which is not achieved with current neural dynamic models as they are learned without considering behavior. We develop a novel preferential subspace identification (PSID) algorithm that models neural activity while dissociating and prioritizing its behaviorally relevant dynamics. Applying PSID to large-scale neural activity in two monkeys performing naturalistic 3D reach-and-grasps uncovered new features for neural dynamics. First, PSID revealed the behaviorally relevant dynamics to be markedly lower-dimensional than otherwise implied. Second, PSID discovered distinct rotational dynamics that were more predictive of behavior. Finally, PSID more accurately learned the behaviorally relevant dynamics for each joint and recording channel. PSID provides a general new tool to reveal behaviorally relevant neural dynamics that can otherwise go unnoticed.

## Introduction

Modeling of how behavior is encoded in the dynamics of neural activity over time is a central challenge in neuroscience. This modeling is essential for investigating or decoding behaviorally measurable brain functions such as movement planning, initiation and execution<sup>1-3</sup>, speech and language<sup>4</sup>, mood<sup>5</sup>, decision making<sup>6</sup>, or neurological dysfunctions such as movement tremor<sup>7</sup>. However, building such models is challenging for two main reasons. First, in addition to the behavior being studied, recorded neural activity also encodes other brain functions, inputs from thousands of other neurons, as well as internal motivational states with brain-wide

29 representations such as thirst<sup>3,8-15</sup>. These together constitute behaviorally irrelevant neural dynamics. Second,  
30 many natural behaviors such as unconstrained movements or speech are temporally structured. Thus  
31 understanding their neural representation is best achieved by learning a dynamic model, which explicitly  
32 characterizes the temporal evolution of neural population activity<sup>3,16-18</sup>. Given these two challenges, answering  
33 increasingly sought-after and fundamental questions about neural dynamics such as their dimensionality<sup>3,13,19</sup> and  
34 important temporal features such as rotations<sup>14,20-22</sup> requires a novel dynamic modeling framework that can  
35 prioritize extracting those neural dynamics that are related to a specific behavior of interest. This would ensure  
36 that behaviorally relevant neural dynamics are not masked or confounded by behaviorally irrelevant ones and will  
37 broadly impact the study of diverse brain functions. Developing such a dynamic modeling framework has  
38 remained elusive to date.

39 Currently, dynamic modeling of neural activity is largely performed according to two alternative conceptual  
40 frameworks. In the first framework, often termed representational modeling (RM), behavioral measurements such  
41 as movement kinematics, choices or tremor intensity at each time are assumed to be directly represented in the  
42 neural activity at that time<sup>2,7,23,24</sup>. By making this assumption, RM implicitly assumes that the dynamics of neural  
43 activity are the same as those in the behavior of interest; the RM framework thus takes behavior to represent the  
44 brain state in the model and learns its dynamics without considering the neural activity (Fig. 1a; Methods). This  
45 assumption, however, may not hold since neural activity in many cortical regions including the prefrontal<sup>6,25</sup>,  
46 motor<sup>20,26-28</sup> and visual<sup>13</sup> cortices and other brain structures such as amygdala<sup>8,9</sup> is often simultaneously responsive  
47 to multiple behavioral and task parameters<sup>6,8,9,25</sup> and thus is not fully explained by the RM framework<sup>3,17,18,20</sup>.  
48 Motivated by this complex neural response, recently a second framework known as neural dynamic modeling  
49 (NDM) has received growing attention<sup>3,5,16,18,20-22,29-32</sup> and has led to recent findings for example about movement  
50 generation<sup>3,20</sup> and mood<sup>5</sup>. In NDM, the dynamics of neural activity are modeled in terms of a latent variable that  
51 constitutes the brain state in the model and is extracted purely using the recorded neural activity and agnostic to

52 the behavior (Fig. 1a). Once extracted, this latent brain state is then assumed to encode the behavior of interest,  
53 such as movement kinematics<sup>21,29,30</sup> or mood<sup>5</sup>. Because NDM does not guide the extraction of neural dynamics by  
54 behavior, it may miss or less accurately learn some of the behaviorally relevant neural dynamics, which are masked  
55 or confounded by behaviorally irrelevant ones. Uncovering these behaviorally relevant neural dynamics requires a  
56 new modeling framework to extract the dynamics that are shared between the recorded neural activity and  
57 behavior of interest, rather than extracting the prominent dynamics present in one or the other as done by current  
58 dynamic models (Fig. 1a)—present in behavior in the case of RM and in neural activity in the case of NDM.

59 In this Technical Report, we develop a novel general modeling and learning algorithm, termed preferential  
60 subspace identification (PSID), for extracting and modeling behaviorally relevant dynamics in high-dimensional  
61 neural activity. PSID uses both neural activity and behavior together to learn (i.e. identify) a dynamic model that  
62 describes neural activity in terms of latent states while prioritizing the characterization of behaviorally relevant  
63 neural dynamics. The key insight in PSID is to identify the subspace shared between high-dimensional neural  
64 activity and behavior, and then extract the latent states within this subspace and model their temporal structure  
65 and dynamics (Methods).

66 We first show with extensive numerical simulations that PSID learns the behaviorally relevant neural dynamics  
67 significantly more accurately, with markedly lower-dimensional latent states, and orders of magnitude fewer  
68 training samples compared with standard methods. We then demonstrate the new functionalities that PSID  
69 enables by applying it to large-scale motor cortical activity recorded in two non-human primates (NHP)  
70 performing an unconstrained naturalistic 3D reach, grasp, and return task. We show that PSID uniquely uncovers  
71 several new features of neural dynamics underlying motor behavior. First, PSID reveals that the dimension of  
72 behaviorally relevant neural dynamics is markedly lower than what standard methods conclude. Second, while  
73 both NDM and PSID find rotational neural dynamics during our unconstrained 3D task, PSID uncovers rotations  
74 that are in the opposite directions in reach vs return epochs and are significantly more predictive of behavior

75 compared with NDM, which in contrast finds rotations in the same direction. Third, compared with NDM and  
76 RM, PSID more accurately learns behaviorally relevant neural dynamics for almost all of the 27 arm and finger  
77 joint angles and for 3D end-point kinematics. Finally, PSID reveals that almost all individual channels across the  
78 large-scale recordings have behaviorally relevant dynamics that are learned more accurately using PSID.

## 79 Results

### 80 Overview of PSID

81 We consider the state of the brain at each point in time as a high-dimensional latent variable of which some  
82 dimensions may drive the recorded neural activity, some may drive the observed behavior, and some may drive  
83 both (Fig. 1a). We thus model the recorded neural activity ( $y_k \in \mathbb{R}^{n_y}$ ) and behavior ( $z_k \in \mathbb{R}^{n_z}$ ) using the  
84 following general dynamic linear state-space model (SSM) formulation

$$\begin{cases} x_{k+1} = A x_k + w_k \\ y_k = C_y x_k + v_k \\ z_k = C_z x_k + \epsilon_k \end{cases}, \quad x_k = \begin{bmatrix} x_k^{(1)} \\ x_k^{(2)} \end{bmatrix}, \quad C_z = [C_{z_1} \quad 0] \quad (1)$$

85 where  $x_k \in \mathbb{R}^{n_x}$  is the latent brain state that drives the recorded neural activity, and  $x_k^{(1)} \in \mathbb{R}^{n_1}$  and  $x_k^{(2)} \in \mathbb{R}^{n_2}$   
86 (with  $n_2 = n_x - n_1$ ) are its behaviorally relevant and behaviorally irrelevant components, respectively. The matrix  
87  $C_z$  is non-zero only in its first  $n_1$  columns (i.e.  $C_{z_1}$ ) indicating that  $x_k^{(1)} \in \mathbb{R}^{n_1}$  drives the behavior but  $x_k^{(2)}$  does  
88 not. Finally,  $\epsilon_k$  represents the behavior dynamics that are not present in the recorded neural activity, and  $w_k$  and  
89  $v_k$  are noises.  $A$ ,  $C_y$ , and  $C_z$  and noise statistics are model parameters to be learned using PSID given training  
90 samples from neural activity and behavior (Methods). This provides a general formulation whose special cases also  
91 include standard NDM (when  $n_2 = 0$  and  $C_z$  is a general matrix to be learned) and RM (when  $C_z$  is identity and  
92  $\epsilon_k = 0$ , Methods).

93 The goal of PSID is to build a model for how high-dimensional neural activity evolves in time while prioritizing  
94 the behaviorally relevant neural dynamics, which are the ones driven by the behaviorally relevant latent states (i.e.

95  $x_k^{(1)}$ , Methods). The key idea for achieving this goal is the demonstration that the behaviorally relevant latent  
96 states lie in the intersection of the space spanned by the past neural activity and the space spanned by the future  
97 behavior (Methods). Using this idea, we can extract the behaviorally relevant latent states via an orthogonal  
98 projection of future behavior onto the past neural activity (Fig. 1b, Methods). The remaining neural dynamics  
99 correspond to the latent states that do not directly drive behavior (i.e.  $x_k^{(2)}$ ). These remaining latent states can then  
100 be extracted by an additional orthogonal projection from the residual neural activity (i.e. the part not predicted by  
101 the extracted behaviorally relevant latent states) onto past neural activity (Methods). Finally, model parameters  
102 that describe the temporal evolution can be learned based on the extracted latent states. Thus, PSID solves two  
103 challenges. It builds a dynamic model of how high-dimensional neural activity evolves in time (temporal  
104 structure) and at the same time dissociates behaviorally relevant and irrelevant dynamics.

105 We compare PSID with standard NDM and RM. Standard NDM describes neural activity using a latent SSM  
106 that is a special case of that in PSID (equation (1)), but in terms of a latent state that is learned agnostic (i.e.,  
107 unsupervised) with respect to behavior<sup>5,21,29,30</sup>; it then regresses the latent states onto the behavior<sup>5,21,29</sup>. Since  
108 standard NDM methods extract the latent states and learn their dynamics without using the observed behavior,  
109 unlike PSID, they do not prioritize the behaviorally relevant neural dynamics. While there are various methods to  
110 learn the latent SSM from neural data in the case of NDM, we use the standard subspace identification (SID)  
111 algorithm<sup>33</sup>, which has been used for NDM before<sup>5,32,34</sup> and like PSID has a closed-form solution<sup>33</sup> and is thus  
112 computationally efficient. SID identifies the latent states by projecting future *neural activity* onto past neural  
113 activity (Fig. 1b) in contrast to PSID that projects future *behavior* onto past neural activity (Fig. 1b). As control  
114 analyses, we also repeat some key NDM analyses with Expectation Maximization (EM) that can also be used to  
115 learn the model in NDM but is iterative and thus computationally complex. To implement RM<sup>2,23</sup>, we use the  
116 commonly-used RM method (sometimes termed Kinematic-state Kalman Filter (KKF)<sup>21</sup>), which builds an auto-  
117 regressive model for the behavior and directly relates the behavior to the neural activity using linear regression<sup>2,23</sup>.

118 RM learns the state and its dynamics agnostic to the observed neural activity (Fig. 2b) and thus, as we will show,  
119 may learn state dynamics that are not encoded in the observed neural activity.

120 Importantly, all three methods (RM, NDM, PSID) describe the neural activity using the same model structure,  
121 which is a linear SSM (Methods). The critical difference is how states and their dynamics are learned from neural  
122 data (NDM), from behavior data (RM) or from both (PSID), and thus which brain states are extracted (Fig. 1a).  
123 After SSM model parameters are learned in each of these three methods, in all of them, the estimation of the state  
124 from neural activity and the decoding of behavior are done using a Kalman filter and linear regression,  
125 respectively (Fig. 1c).

## 126 **Neural Recordings**

127 We first validated PSID using extensive numerical simulations and then used PSID to uncover the behaviorally  
128 relevant neural dynamics in large-scale cortical recordings of two adult Rhesus macaques performing  
129 unconstrained naturalistic 3D reach, grasp, and return movements (Methods). In each trial, this task requires the  
130 monkey to reach for an object, grasp it, and then release the object and return the hand to the resting position. The  
131 angle of 27 (monkey J) or 25 (monkey C) joints on the right shoulder, elbow, wrist, and fingers at each point in  
132 time is tracked via reflective markers and is taken as the behavior of interest (Methods). In addition to joint angles,  
133 we also study the 3D end-point position of hand and elbow as the behavioral measurements. Large-scale neural  
134 activity was recorded from primary motor cortex (M1), dorsal premotor cortex (PMd), ventral premotor cortex  
135 (PMv), and prefrontal cortex (PFC) and for monkey C also included ipsilateral coverage (Methods). We used the  
136 local field potential (LFP) power in 7 frequency bands as the neural features to be modeled (Methods, Discussion).  
137 We use the cross-validated correlation coefficient (CC) of decoding behavior using neural activity as the main  
138 measure for how accurately the behaviorally relevant neural dynamics are learned.

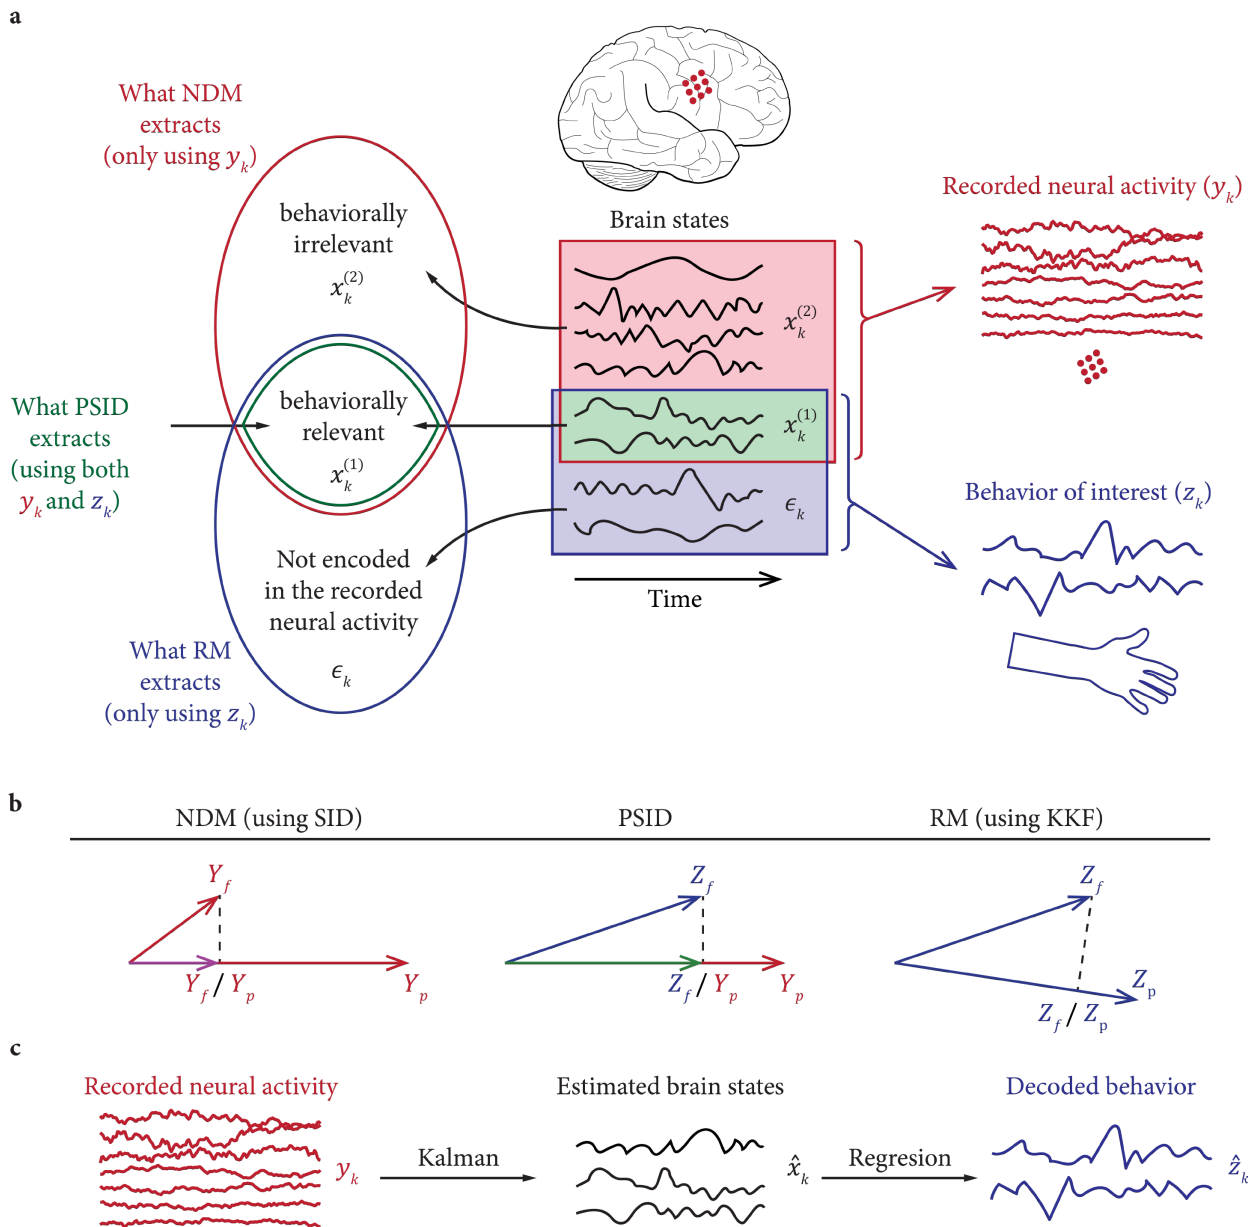

**Figure 1. PSID enables learning of dynamics shared between recorded neural activity and measured behavior.**

(a) Schematic view of how the state of the brain can be thought of as a high-dimensional time varying variable of which some dimensions ( $x_k^{(1)}$  and  $x_k^{(2)}$ ) drive the recorded neural activity ( $y_k$ ), some dimensions ( $x_k^{(1)}$  and  $\epsilon_k$ ) drive the measured behavior ( $z_k$ ), and some dimensions ( $x_k^{(1)}$ ) drive both and are thus shared between them. The choice of a learning method affects the brain states that are extracted from neural activity. NDM extracts states regardless of their relevance to behavior and RM extracts states regardless of their relevance to recorded neural activity. PSID enables extraction of brain states that are related to both the recorded neural activity and a specific behavior. (b) Schematics of how PSID achieves its goal in comparison with a representative NDM method (i.e. SID) and an RM method (i.e. KKF).  $A/B$  denotes projecting  $A$  onto  $B$  (Methods). The key idea in PSID is to project future behavior  $z_k$  (denoted by  $Z_f$ ) onto past neural activity  $y_k$  (denoted by  $Y_p$ ). This is unlike NDM using SID, which instead projects future neural activity (denoted by  $Y_f$ ) onto the past neural activity  $Y_p$  (Methods). It is also unlike RM using KKF, which projects future behavior onto past behavior (denoted by  $Z_p$ ). (c) For all three methods, after the model parameters are learned, the procedures for state estimation and neural decoding of behavior are the same. A Kalman filter operating on the neural activity estimates the brain states, and behavior is decoded by applying a linear regression to these estimated brain states (Methods).

139

## 140 **PSID correctly learns all the model parameters**

141 We first performed simulations and found that the PSID algorithm can correctly identify all the true model  
142 parameters from data. We generated 100 validation models with random parameters and simulated sample data  
143 from each model (Methods). We then performed model identification with the PSID algorithm and evaluated the  
144 error in identification of all model parameters (Supplementary Fig. 1). We found that all model parameters were  
145 identified with less than 1% error (Supplementary Fig. 1a). Also, the identification error consistently decreased as  
146 the number of training samples increased, suggesting that even smaller errors can be achieved using more training  
147 samples (Supplementary Figure 1b). Also, compared with standard SID, PSID showed a similar error and rate of  
148 convergence (Supplementary Fig. 1c, d), indicating that even when learning of all latent states is of interest rather  
149 than just the behaviorally relevant ones, PSID performs as well as SID. Finally, we found that given a fixed training  
150 sample size, the identification error of both PSID and SID for different random models was significantly  
151 correlated with a mathematical measure of how inherently difficult it was to extract the latent states in these  
152 models from data (Supplementary Fig. 2); this indicates that with sufficient training data, even models that are  
153 inherently more difficult to learn can eventually be identified accurately. Together, these results show that PSID  
154 can correctly identify both the behaviorally relevant and irrelevant latent states.

155 In the above analysis, for each true validation model, we used PSID to fit a model with the same model structure  
156 parameters  $n_x$  and  $n_1$  as the true model (Methods). We next found that using a cross-validation procedure  
157 (Methods), we could accurately estimate both model structure parameters from training data (Supplementary Fig.  
158 3).  $n_x$  and  $n_1$  were estimated with no error in 98% and 94% of the models, respectively; also, their average  
159 estimation errors were  $0.040 \pm 0.028$  (mean  $\pm$  s.e.m.) and  $0.050 \pm 0.021$ , respectively (Supplementary Fig. 3a, c).  
160 The error in estimating  $n_x$  was similar to that achieved when using the same cross-validation procedure for the  
161 standard SID ( $0.08 \pm 0.039$ ), which also has the parameter  $n_x$  (Supplementary Fig. 3b).



## 162 **PSID prioritizes identification of behaviorally relevant dynamics**

163 We found that, unlike standard methods, PSID correctly prioritizes identification of behaviorally relevant  
164 dynamics even when performing dimensionality reduction, i.e., even when identifying models with fewer latent  
165 states than the total number of latent states in the true model. We applied PSID to simulated data from 100  
166 random validation models with 16 latent states ( $n_x = 16$ ) out of which 4 were behaviorally relevant ( $n_1 = 4$ ). We  
167 used PSID to identify models with different latent state dimensions and evaluated how closely the identified latent  
168 state dynamics matched the true behaviorally relevant latent state dynamics. As the main performance measure,  
169 we computed the identification error for learning the eigenvalues of the behaviorally relevant component of the  
170 state transition matrix  $A$  (Methods). These eigenvalues specify the frequency and decay rate of the response of the  
171 latent states to excitations (i.e.  $w_k$ ) and thus determine their dynamical characteristics (Methods). The location of  
172 eigenvalues in the true and identified models is illustrated in Fig. 3a for one of the validation models. We found  
173 that PSID accurately identifies the behaviorally relevant latent states while standard methods can identify latent  
174 states that are unrelated to behavior (NDM), or latent states that are not encoded in the observed neural activity  
175 (RM). Overall, using a total latent state dimension of 4, PSID learned all 4 behaviorally relevant eigenvalues while  
176 the standard methods could not (Fig. 2a); further, PSID achieved higher accuracy compared with standard  
177 methods even when they used higher dimensional latent states (Fig. 2b).

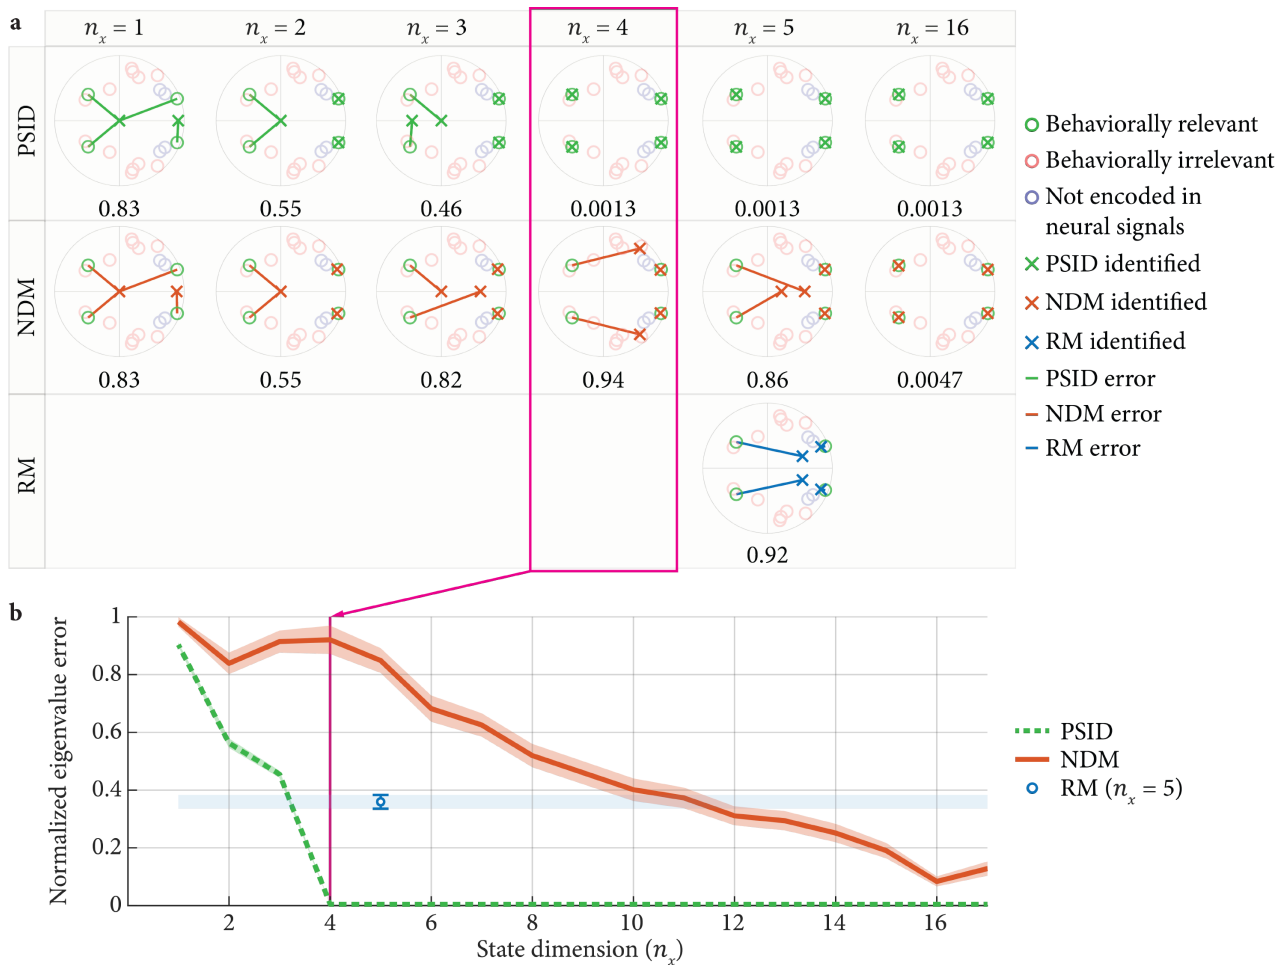

**Figure 2. PSID correctly learns the behaviorally relevant dynamics even when using fewer latent states and performing dimensionality reduction in contrast to standard methods.**

(a) For one simulated model, the identified behaviorally relevant eigenvalues are shown for PSID, NDM, and RM and for different latent state dimensions. For RM, the state dimension can only be equal to the behavior dimension (here  $n_z = 5$ ). Eigenvalues are shown on the complex plane, i.e. real part on the horizontal axis and imaginary part on the vertical axis. The unit circle is shown in gray. True model eigenvalues are shown as lightly colored circles, with colors indicating their relevance to neural activity, behavior, or both. Crosses show the identified behaviorally relevant eigenvalues. Lines indicate the identified eigenvalue error whose normalized value—average line length normalized by the average true eigenvalue magnitude—is noted below each plot (Methods). (b) Normalized eigenvalue error given  $10^6$  training samples is shown when using PSID, NDM and RM, averaged over 100 random models. For all random models, the total number of latent states ( $n_x = 16$ ), the number of behaviorally relevant states ( $n_1 = 4$ ), and the number of behavior dimensions not encoded in neural activity (i.e. 4) is as in (a). Solid lines show the average error and shaded areas show the s.e.m. For NDM and PSID, total state dimension is changed from 1 to 16 (for PSID  $n_1 = 4$ ). Since for RM the state dimension can only be equal to the behavior dimension ( $n_z = 5$ ), for easier comparison, the RM s.e.m is shown as error bars and also a horizontal shaded area.

178

### 179 PSID requires fewer training samples

180 The previous results show that given the same training data, unlike NDM, PSID can identify the behaviorally  
 181 relevant dynamics when used in the dimensionality reduction regime (i.e. with fewer latent states than the total

182 number of latent states in the actual model, Fig. 2b for  $n_x < 16$ ); and that even when the latent state dimension is  
183 as high as the actual model, PSID is more accurate than NDM in learning behaviorally relevant dynamics (Fig. 2b  
184 for  $n_x = 16$ ). To further investigate how this PSID advantage depends on the training sample size, we evaluated  
185 each method when using different number of training samples. We found that RM and NDM in the  
186 dimensionality reduction regime could not learn behaviorally relevant dynamics even when training samples  
187 converged toward being unlimited (Supplementary Fig. 4a, b). Also importantly, even compared with NDM with a  
188 latent state dimension as high as the actual model, PSID achieved several orders of magnitude reduction in the  
189 number of training samples required to identify these dynamics because PSID prioritized them. In terms of both  
190 identifying behaviorally relevant eigenvalues and decoding behavior from neural activity, PSID required only  
191 about 0.2% of the training samples that NDM needed to achieve a similar accuracy (i.e. 500 times fewer;  
192 Supplementary Fig. 4). As training data in experiments is limited, this is another advantage of PSID, which aims to  
193 prevent the behaviorally relevant dynamics from being masked or confounded by the behaviorally irrelevant ones.

## 194 **PSID reveals a markedly lower dimensionality for behaviorally relevant neural dynamics in motor** 195 **cortex**

196 Given that PSID can prioritize learning of behaviorally relevant neural dynamics and dissociate them from  
197 behaviorally irrelevant ones, we used it to investigate the behaviorally relevant neural dynamics and their true  
198 dimensionality in large-scale motor cortical recordings during reach, grasp and return movements (Fig. 3,  
199 Methods). We found that PSID reveals the behaviorally relevant neural dynamics to be much lower-dimensional  
200 than would otherwise be concluded using standard methods (Fig. 3b, h), and that PSID identifies these dynamics  
201 more accurately than standard methods (Fig. 3a, c, g, i). To find the behaviorally relevant neural dynamics, we  
202 used PSID, NDM and RM to model neural features with various state dimensions (Fig. 3a, g). The dimension of  
203 behaviorally relevant neural dynamics is defined as the minimal state dimension required to best explain behavior  
204 using neural activity. To find this dimension from data, for each method and in each dataset, we found the

205 smallest state dimension at which the best possible behavior decoding performance was achieved (Methods,  
206 Supplementary Fig. 5a, b). First, we found that the best possible decoding performance using PSID was  
207 significantly higher than the best possible decoding performance using both NDM and RM in both monkeys,  
208 suggesting that PSID more accurately learns behaviorally relevant neural dynamics (Fig. 3c, i;  $P < 10^{-5}$ ; one-sided  
209 signed-rank;  $N_s \geq 48$ , Methods). Second, importantly, this best performance was achieved using a significantly  
210 smaller state dimension with PSID compared with NDM and RM—a median dimension of only 4 in both  
211 monkeys with PSID versus 12-30 with NDM and RM, or at least 3 times smaller (Fig. 3b, h;  $P < 10^{-9}$ ; one-sided  
212 signed-rank;  $N_s \geq 48$ ). Third, we confirmed with numerical simulations that PSID accurately estimates the true  
213 dimension of behaviorally relevant neural dynamics, whereas NDM overestimates it (Supplementary Fig. 5a, b).  
214 Finally, as a control analysis, we repeated NDM using the standard EM algorithm instead of the standard SID, and  
215 found similar results: PSID again achieved a significantly better decoding performance ( $P < 10^{-9}$ ; one-sided  
216 signed-rank;  $N_s \geq 48$ ) using significantly lower-dimensional latent states ( $P < 10^{-7}$ ; one-sided signed-rank;  $N_s \geq$   
217 48). Together these results suggest that the behaviorally relevant motor cortical dynamics have a markedly lower  
218 dimension than is found by standard methods; PSID reveals this low dimension by more accurately learning  
219 behaviorally relevant neural dynamics and dissociating them from behaviorally irrelevant ones.

220 We next found that the dimensionality of the behaviorally relevant neural dynamics was much lower than that  
221 of neural dynamics or joint angle dynamics, suggesting that the low-dimensionality PSID finds is not simply  
222 because either neural or behavior dynamics are just as low-dimensional. To quantify the dimensionality of neural  
223 and behavior dynamics, we found the latent state dimension required to achieve the best self-prediction of neural  
224 or behavioral signals using their own past, and defined it as the total neural or behavior dynamics dimension,  
225 respectively (Methods). We confirmed in numerical simulations that this procedure correctly estimates the total  
226 latent state dimension in each signal (Supplementary Fig. 5c, d, e). First, for the neural features, we found that in  
227 both monkeys a median latent state dimension of at least 100 was required to achieve the best neural self-

228 prediction (Fig. 3d, f, j, l), which is significantly larger than the behaviorally relevant neural dynamics dimension  
229 of 4 as revealed by PSID ( $P < 10^{-18}$ ; one-sided rank-sum;  $N_s \geq 48$ ). Second, for the behavior defined as joint  
230 angles, we found that in both monkeys a median latent state dimension of 40 was required to achieve the best  
231 behavior self-prediction (Fig. 3e, f, k, l), which is again significantly larger than the behaviorally relevant neural  
232 dynamics dimension of 4 as revealed by PSID ( $P < 0.004$ ; one-sided rank-sum). Moreover, the *self-prediction* of  
233 behavior from its own past was much better than its decoding from neural activity (Fig. 3a, e, g, k) and reached an  
234 almost perfect CC of 0.98 for both monkeys (Fig. 3e, k), indicating that there are predictable dynamics in behavior  
235 that are not present in the recorded neural activity (corresponding to  $\epsilon_k$  in Fig. 1). Taken together, these results  
236 suggest that beyond the low-dimensional behaviorally relevant neural dynamics extracted via PSID, both recorded  
237 neural activity and behavior have significant additional dynamics that are predictable from their own past but are  
238 unrelated to the other signal; PSID uniquely enables the dissociation of shared dynamics from the dynamics that  
239 are present in one signal but not the other (Fig. 1).

240 Finally, we found that the above results held irrespective of the exact behavioral signal. We repeated all the  
241 above analyses for the 3D position of hand and elbow taken as the behavioral signal (instead of joint angles) and  
242 found consistent results (Supplementary Fig. 6). PSID again revealed a significantly lower dimension for  
243 behaviorally relevant neural dynamics compared with NDM for both monkeys ( $P < 10^{-6}$ ; one-sided signed-rank;  
244  $N_s \geq 48$ ) and achieved a significantly better decoding compared with NDM and RM ( $P < 10^{-8}$ ; one-sided signed-  
245 rank;  $N_s \geq 48$ ). Moreover, in both monkeys, the dimension of behaviorally relevant neural dynamics revealed by  
246 PSID was again significantly smaller than the dimension of dynamics in the recorded neural activity ( $P < 10^{-18}$ ;  
247 one-sided rank-sum) and in behavior ( $P < 0.004$ ; one-sided rank-sum) as estimated based on their self-prediction.

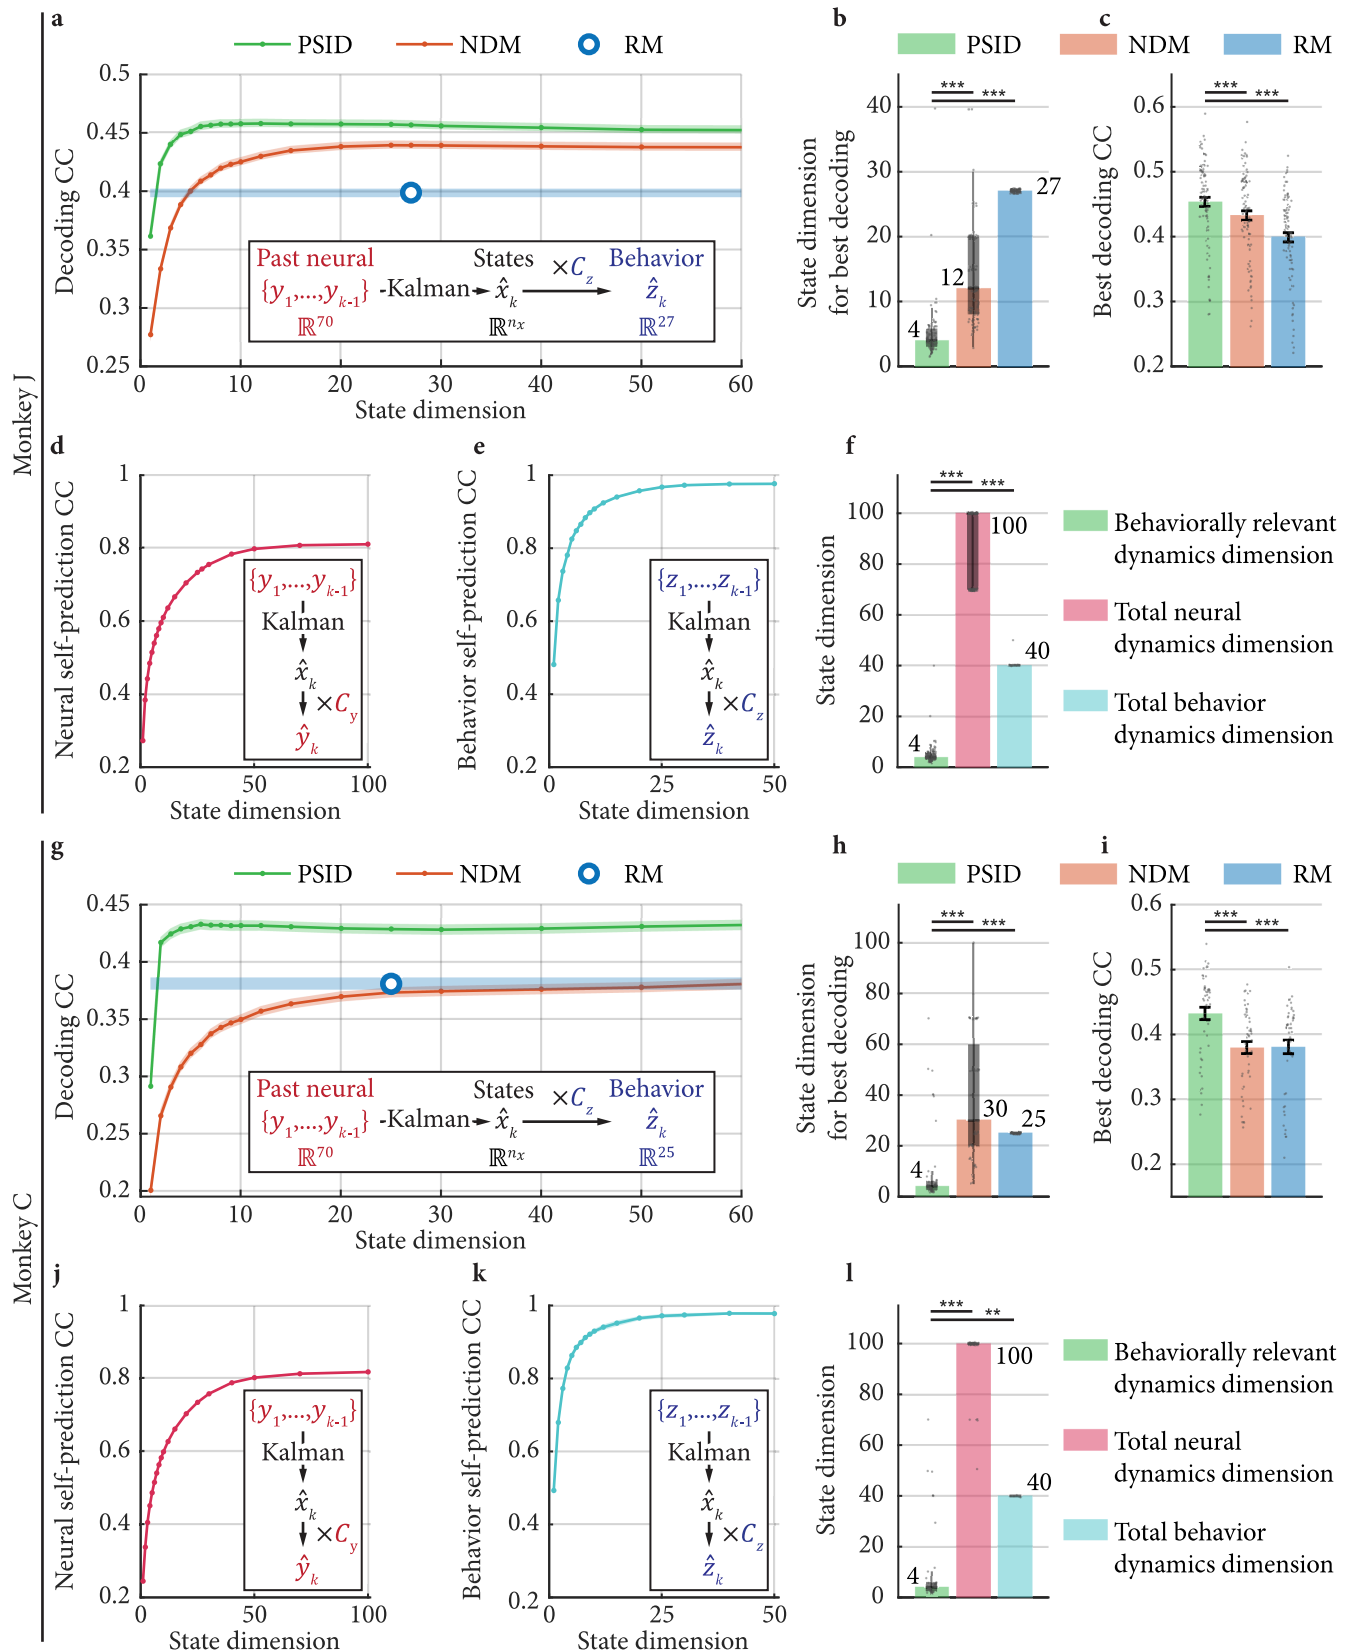

**Figure 3. PSID reveals a markedly lower dimension for behaviorally relevant neural dynamics in the motor cortex during unconstrained naturalistic 3D reach, grasp and return movements.**

(a) Average joint angle decoding accuracy, i.e. cross-validated correlation coefficient (CC), as a function of the state dimension using PSID, NDM, and RM. Decoding CC is averaged across the datasets and the shaded area indicates the s.e.m. Dimensionality of neural activity (i.e. 70) and behavior (i.e. 27) are shown in a box along with the decoder structure. (b) The

state dimension that achieves the best decoding in each dataset. Bars show the median (also written next to the bar), box edges show the 25<sup>th</sup> and 75<sup>th</sup> percentiles, and whiskers represent the minimum and maximum values (other than outliers). Outliers are the points that are more than 1.5 times the interquartile distance, i.e. the box height, away from the top and bottom of the box. All data points are shown. Asterisks indicate significance of statistical tests with \*:  $P < 0.05$ , \*\*:  $P < 0.005$ , \*\*\*:  $P < 0.0005$ , and n.s.:  $P > 0.05$ . (c) Best decoding CC in each dataset (state dimensions from (b)). For decoding, bars show the mean and whiskers show the s.e.m. (d) One-step-ahead self-prediction of neural activity (cross-validated CC), averaged across datasets. (e) Same as (d) for behavior. (f) The behaviorally relevant neural dynamics dimension (i.e. PSID result from (b)), total neural dynamics dimension (i.e. state dimension from (d)), and total behavior dynamics dimension (i.e. state dimension from (e)) for all datasets. (g)-(l) Same as (a)-(f), for monkey C.

248

## 249 **PSID reveals behaviorally relevant rotational dynamics that otherwise go unnoticed**

250 Reducing the dimension of neural population activity and finding its low-dimensional representation are  
251 essential for visualizing and characterizing the relationship of neural dynamics to behavior<sup>14,16,20-22</sup>. We  
252 hypothesized that PSID would be particularly beneficial for doing this compared with standard NDM methods,  
253 because PSID can prioritize and directly dissociate the behaviorally relevant dynamics within neural activity. To  
254 test this hypothesis, we used PSID and NDM to extract a 2D representation of neural dynamics (Fig. 4), which is  
255 commonly done to visualize neural dynamics on planes<sup>14,20-22</sup>. We then compared the properties and the decoding  
256 accuracy of the extracted 2D dynamics. To do this, using both PSID and NDM, we fitted models with latent states  
257 of dimension 2 to neural activity during our naturalistic 3D reach, grasp and return task (Fig. 4a), estimated the  
258 latent states from neural activity using these models (Methods), and then plotted the two estimated latent states  
259 against each other during reach and return movement epochs (Fig. 4b, c, e, f).

260 We found that in both monkeys, both PSID and NDM extracted neural states that exhibited rotational  
261 dynamics. This suggests that our complex task with unconstrained naturalistic 3D reaches and grasps involves  
262 rotational motor cortical dynamics akin to what has been observed for reaching during other tasks, often  
263 involving 2D cursor control<sup>14,20-22</sup>. However, surprisingly, a clear difference emerged in the properties of rotations  
264 uncovered by PSID compared with NDM when we considered the dynamics during the return movement epochs.  
265 During the return epochs, the 2D neural dynamics extracted using PSID showed a rotation in the opposite  
266 direction of the rotation during the reach epochs (Fig. 4b, e). In contrast, similar to results from prior work<sup>21</sup>,

267 neural dynamics extracted using NDM showed a rotation in the same direction during both reach and return  
268 epochs (Fig. 4c, f). As the behavior involves opposite directions of movement during reach and return epochs,  
269 these results intuitively suggest that PSID finds a low-dimensional mapping of neural population activity that is  
270 more behaviorally relevant (Fig 4a). To quantify this suggestion, we decoded the behavior using the low-  
271 dimensional latent states in each case. We found that the 2D latent states extracted using PSID explained the  
272 behavior significantly better than those extracted using NDM and led to significantly better decoding (Fig. 4d, g;  $P$   
273  $< 10^{-9}$ ; one-sided signed-rank;  $N_s \geq 48$ ). Moreover, the decoding accuracy using the PSID extracted 2D states  
274 was only 7% (Monkey J) or 4% (Monkey C) worse than the best possible PSID decoding whereas for NDM the  
275 decoding using 2D states was 23% (Monkey J) or 30% (Monkey C) worse than NDM's best possible decoding (Fig.  
276 3a, g). This indicates that while both types of rotational dynamics depicted in Fig. 4 exist in the high-dimensional  
277 manifold traversed by the neural activity, PSID extracted the 2D mapping that preserved the more behaviorally  
278 relevant neural dynamics (an illustrative example is provided in Supplementary Video 1). These results suggest  
279 that PSID can reveal low-dimensional behaviorally relevant neural dynamics that may otherwise be missed when  
280 using standard NDM methods.

281 Beyond the above 2D results, the marked advantage of PSID over NDM when performing dimensionality  
282 reduction held across all dimensions (Fig. 3a, g). At any given latent state dimension, PSID extracted a low-  
283 dimensional state that resulted in substantially better decoding compared with NDM (Fig. 3a, g). This suggests  
284 that even beyond a 2D dimensionality reduction for visualization, PSID could be used as a general dynamic  
285 dimensionality reduction method that preferentially preserves the most behaviorally relevant dynamics  
286 (Discussion).

287 Finally, as a control, we found that jPCA, which is another behavior agnostic method specifically designed for  
288 extracting rotational dynamics<sup>20</sup>, also extracted unidirectional rotations similar to NDM (Supplementary Fig. 7).



289 As another control, we repeated NDM with standard EM algorithm instead of the standard SID and found that it  
 290 again extracted very similar unidirectional rotations as those found with SID.

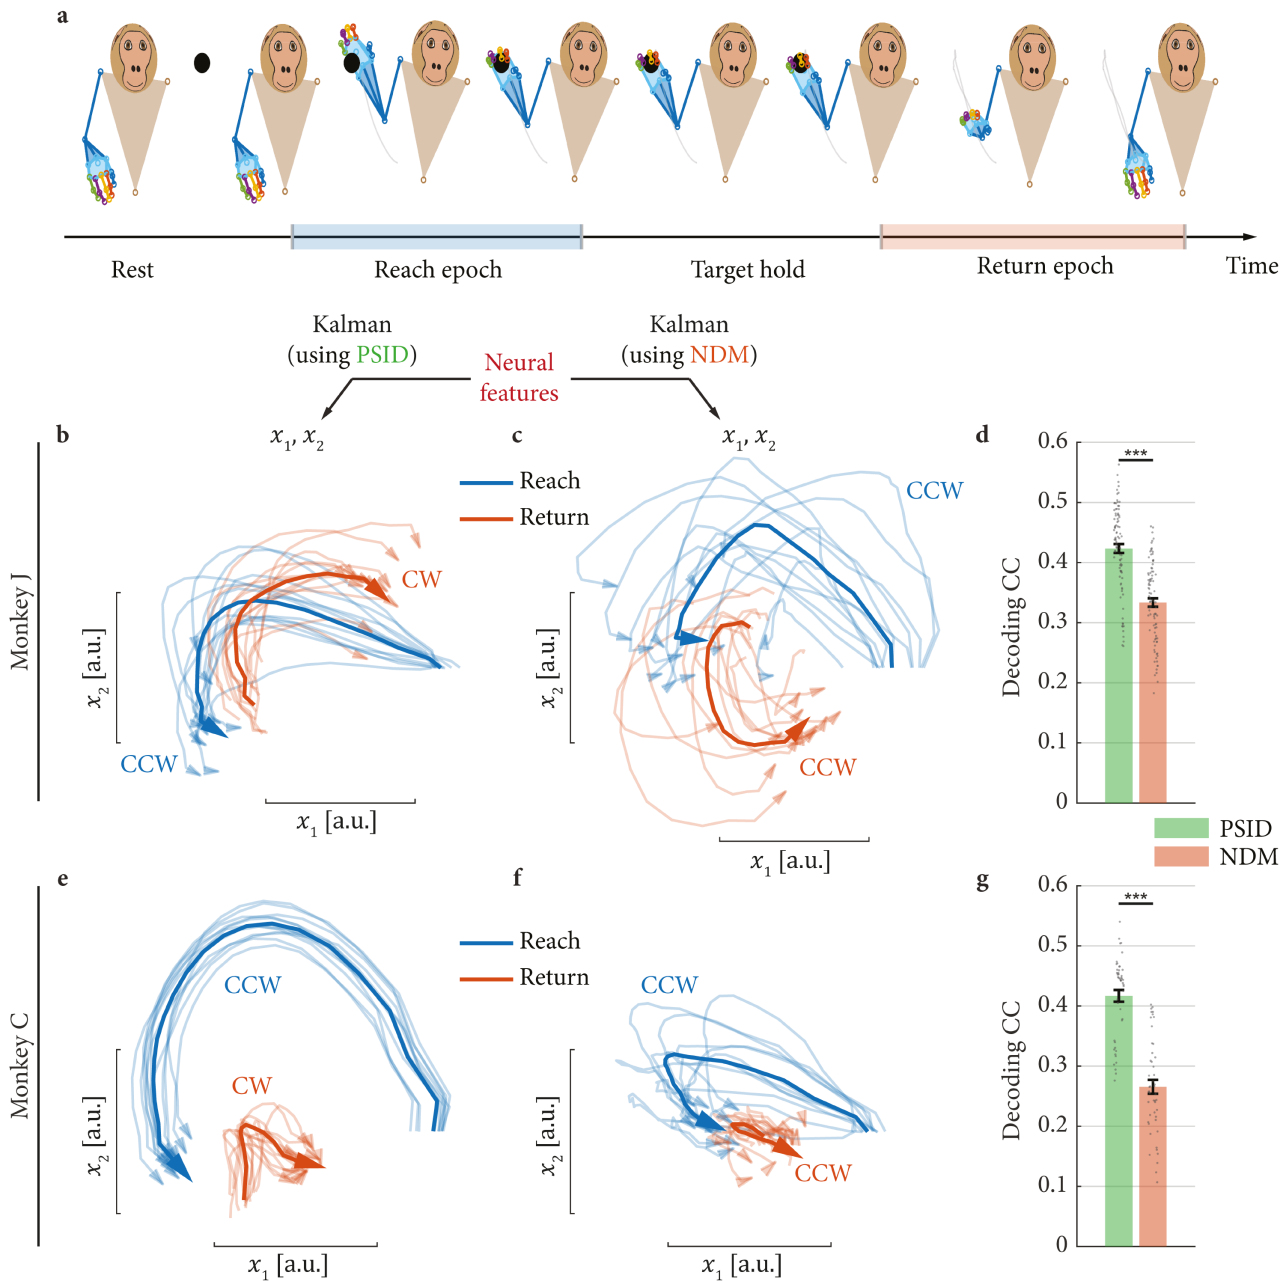

**Figure 4. PSID reveals rotational neural dynamics with opposite direction during 3D reach and return movements, which is not found by standard methods.**

(a) Example reach and return epochs in the task defined as periods of movement toward the target and back from the target, respectively. Pictures are recreated using the 3D tracked markers and are from a view facing the monkey. (b) The latent neural state dynamics during 3D reach (blue) and return (red) movements found by PSID with 2D latent states ( $n_x = n_1 = 2$ ). We plot the states starting at the beginning of a reach/return movement epoch; the arrows mark the end of the movement epoch. Light lines show the average trace over trials in each dataset and dark lines show the overall average trace across datasets. The direction of rotation is noted by CW for clockwise or CCW for counter clockwise. States have arbitrary units (a.u.). (c) Same

as (a) but using NDM with 2D latent states ( $n_x = 2$ ). (d) Cross-validated correlation coefficient (CC) between the decoded and true joint angles, decoded with the latent states extracted using PSID and NDM in (a) and (b). Bars, whiskers and asterisks are defined as in Fig. 3c. (e)-(g) Same as (b)-(d), for monkey C.

291

## 292 PSID extracted dynamics are more informative of behavior for almost all joints

293 Previous results showed that on average across the arm and finger joints, PSID identified latent states that led to  
294 significantly better decoding of reach, grasp, and return behavior compared with states of the same (Fig. 3a, g) or  
295 even higher dimension obtained from NDM or from RM (Fig. 3c, i). We next found that this result held for almost  
296 all arm or finger joints separately as well and was not restricted to a limited set of joints (e.g. only finger joints).  
297 Computing the best decoding accuracy of each joint separately (Supplementary Fig. 8), we found that PSID  
298 achieved better decoding than NDM for all individual joints in both monkeys and that this difference was  
299 statistically significant in almost all joints (Supplementary Fig. 8b, d;  $P < 10^{-4}$  for all joints in monkey C and  $P <$   
300  $10^{-12}$  for 25 of 27 joints in monkey J; one-sided signed-rank test;  $N_s = 240$  and  $N_s = 455$  for monkeys C and J,  
301 respectively). Moreover, PSID achieved significantly better decoding than RM for all 27 joints in monkey J  
302 (Supplementary Fig. 8b;  $P < 0.04$  for each joint; one-sided signed-rank;  $N_s = 455$ ) and for 24 of the 25 joints in  
303 monkey C (Supplementary Fig. 8d;  $P < 0.004$  for each joint; one-sided signed-rank;  $N_s = 240$ ), and similar  
304 decoding for 1 joint in monkey C ( $P = 0.27$  two-sided signed-rank;  $N_s = 240$ ). Additionally, the significantly  
305 better decoding in PSID was achieved using states of significantly lower dimension compared with NDM and RM  
306 (Supplementary Fig. 8a, c;  $P < 10^{-90}$ ; one-sided signed-rank;  $N_s \geq 1200$ ). Specifically, PSID used a median state  
307 dimension of 3 (monkey J) or 2 (monkey C) while NDM used a median state dimension of 8 (monkey J) or 15  
308 (monkey C), and RM used a state dimension of 27 (monkey J) or 25 (Monkey C).

309 **PSID extracted dynamics are more informative of behavior for almost all recording channels across**  
310 **premotor, primary motor, and prefrontal areas**

311 We found that PSID was extracting more behaviorally relevant information from each recording channel rather  
312 than performing an implicit channel selection by discarding some channels with no behaviorally relevant  
313 information. To distinguish between these alternatives, we repeated the modeling but this time using only the  
314 neural features from one channel at a time (Fig. 5). We found that for both monkeys, PSID achieved significantly  
315 better decoding of behavior in at least 96% and 98% of individual channels compared with NDM and RM,  
316 respectively (Fig. 5b, d;  $P < 0.05$  for each channel; one-sided signed-rank;  $N_s \geq 20$ ). Moreover, PSID achieved this  
317 significant improvement in decoding while using significantly lower state dimensions than NDM and RM (Fig. 5a,  
318 c;  $P < 10^{-68}$ ; one-sided signed-rank;  $N_s \geq 512$ ). Specifically, PSID used a median state dimension of only 5 for  
319 both monkeys while NDM used a median state dimension of 15 (monkey J) or 20 (monkey C), and RM used a  
320 state dimension of 27 (monkey J) or 25 (Monkey C). Thus, while recording channels from different anatomical  
321 regions (including ipsilateral PMd and PMv coverage in monkey C) had different ranges of decoding accuracy  
322 (Fig. 5b, d), even channels with a relatively weak decoding saw an improvement in decoding accuracy when using  
323 PSID. These results suggest that almost all channels contained behaviorally relevant dynamics and PSID could  
324 more accurately model these dynamics leading to better decoding of behavior while also using lower-dimensional  
325 latent states.

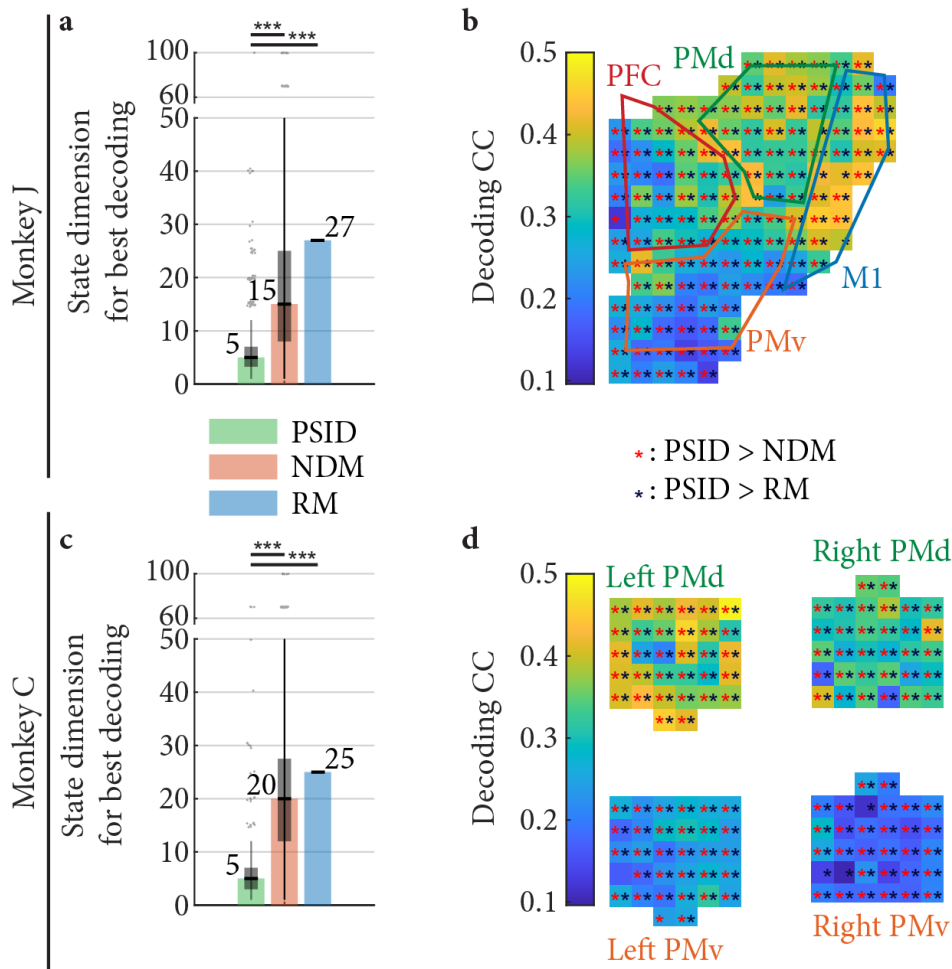

**Figure 5. PSID more accurately identified the behaviorally relevant dynamics in each recording channel across premotor, primary motor, and prefrontal areas.**

(a) The state dimension used by each method to achieve the best decoding using the neural features from each recording channel separately. For PSID and NDM, for each channel, the latent state dimension is chosen to be the smallest value for which the decoding CC reaches within 1 s.e.m. of the best decoding CC using that channel among all latent state dimensions. Bars, boxes and asterisks are defined as in Fig. 3b. (b) Cross-validated correlation coefficient (CC) between the decoded and true joint angles is shown for PSID. Asterisks mark channels for which PSID results in significantly ( $P < 0.05$ ) better decoding compared with NDM (red asterisk) or RM (dark blue asterisk). The latent state dimension for each method is chosen as in (a). (c)-(d) Same as (a)-(b), for monkey C.

326

## 327 Discussion

328 Here we develop and demonstrate a novel PSID algorithm for dissociating and modeling behaviorally relevant  
 329 neural dynamics. Our simulations showed that compared with current methods, PSID learns the behaviorally  
 330 relevant neural dynamics significantly more accurately, with markedly lower-dimensional latent states, and orders  
 331 of magnitude fewer training samples. Our analyses on NHP motor cortical activity during an unconstrained 3D

332 reach, grasp and return task confirmed these findings and revealed multiple new features of the underlying neural  
333 dynamics. First, PSID revealed the behaviorally relevant neural dynamics to be much lower-dimensional than  
334 implied by standard methods, and identified these dynamics more accurately as evident by better behavior  
335 decoding (Fig. 3). Second, PSID revealed distinct low-dimensional rotational dynamics in neural activity with  
336 opposite directions of rotation during reach and return epochs, which were more predictive of behavior than the  
337 alternative unidirectional rotational dynamics found by standard methods (Fig. 4). Finally, PSID resulted in  
338 significantly better decoding for almost any arm and finger joint angle (Supplementary Fig. 8) and for individual  
339 recording channels (Fig. 5). These results suggest that PSID can reveal low-dimensional behaviorally relevant  
340 neural dynamics that can otherwise go unnoticed.

341 The key idea in PSID was to ensure behaviorally relevant neural dynamics are not missed or confounded by  
342 prioritizing them in fitting the dynamic model. To do so, PSID models the neural activity as a latent SSM while  
343 prioritizing latent states that are informative of the behavior. Prior methods for NDM, including the standard SID  
344 or EM with linear dynamics<sup>5,16,30,32</sup> as well as those with generalized linear dynamic systems (GLDS)<sup>29,35</sup> or  
345 nonlinear dynamic models such as recurrent neural networks (RNN)<sup>22</sup>, are agnostic to behavior in fitting the  
346 dynamic model unlike PSID that takes behavior into account in fitting the dynamic model. Thus PSID can  
347 uncover important behaviorally relevant neural dynamics that may otherwise be discarded, such as the reversed  
348 rotational dynamics during return epochs in our task that were not revealed by NDM (Fig. 4, Supplementary  
349 Video 1).

350 Prior works have reported low-dimensional rotational neural dynamics during different tasks, often involving  
351 2D control of a cursor<sup>14,20-22</sup>. Here we also found low-dimensional rotational dynamics during an unconstrained  
352 naturalistic 3D reach, grasp and return task—using PSID and NDM that have no supervision to try to do so as  
353 well as jPCA<sup>20</sup> that aims to find rotations. However, while both NDM and PSID revealed rotations in neural  
354 dynamics during reach epochs, interestingly, the directions of the identified rotations were different in the return

355 epochs between NDM and PSID. Similar to prior work applying NDM and jPCA to a center-out 2D cursor  
356 control task<sup>21</sup>, here NDM and jPCA extracted rotations in the same direction during reach and return epochs. In  
357 contrast, PSID extracted rotations that were in the opposite directions during reach and return epochs, and  
358 further were more behaviorally relevant (i.e. had significantly better behavior decoding accuracy, which was also  
359 close to the best decoding possible with even large latent state dimensions). This result demonstrates that while  
360 both the NDM- and PSID-extracted low-dimensional rotational dynamics existed in the high-dimensional neural  
361 activity (Supplementary Video 1), PSID revealed a low-dimensional mapping that preserved the behaviorally  
362 relevant components of neural dynamics. Future application of PSID to other behavioral tasks and brain regions  
363 may similarly reveal behaviorally relevant features of neural dynamics that may otherwise not be uncovered.

364 Our neural data was recorded from the motor cortical areas, which strongly encode movement related  
365 information and thus have long enabled motor brain machine interfaces<sup>1,2,23</sup>. Given this strong motor encoding,  
366 both RM, which models the dynamics of behavior agnostic to neural activity<sup>2,23</sup>, and NDM, which indiscriminately  
367 models all neural dynamics agnostic to behavior<sup>21,29,30,32</sup>, have been successful in decoding movement. Despite this  
368 strong encoding in motor cortical activity, PSID still resulted in significant improvements in decoding compared  
369 with standard methods and did so using smaller latent state dimensions (Fig. 3 and Supplementary Fig. 8). Our  
370 per channel analysis further showed that every channel contained behaviorally relevant information, which was  
371 better learned using PSID, thus resulting in decoding improvements (Fig. 5). Many brain functions such as  
372 memory<sup>36</sup> and mood<sup>5</sup> or brain dysfunctions such as epileptic seizures<sup>7</sup> could have a more distributed or less  
373 targetable representation in neural activity. As a result, using PSID in such applications may prove even more  
374 beneficial since the activity is likely to contain more behaviorally irrelevant dynamics.

375 PSID can also be viewed as a dynamic dimensionally reduction method that provides a low-dimensional  
376 mapping of neural activity while preserving the behaviorally relevant information. PSID is a dynamic method  
377 since it models the temporal structure in neural activity (equation (1))—how it evolves over time. It can hence

378 also aggregate information over time to optimally extract the latent brain state (Methods). Dynamic  
379 dimensionality reduction methods—i.e. methods that explicitly take into account temporal structure in extracting  
380 latent states such as Gaussian process factor analysis (GPFA)<sup>35</sup> and SSM<sup>5,16,21,29,30,32,34</sup>—perform the dimensionality  
381 reduction only based on neural activity and are agnostic to behavior. In contrast, PSID enables taking behavior  
382 into account to ensure behaviorally relevant neural dynamics are accurately revealed. Thus, by focusing on  
383 behaviorally relevant neural dynamics, PSID can achieve a targeted dynamic dimensionality reduction that can be  
384 more suitable for studying neural mechanisms underlying a behavior of interest. For example, a multitude of prior  
385 works have reported that variables with 10-30 dimensions can sufficiently explain the information in motor  
386 cortical neural activity using dynamic (or non-dynamic) dimensionality reduction algorithms such as GPFA,  
387 RNN, and SSM<sup>3,13,19,21,22,30,34,35</sup>. However, unlike PSID, the algorithms used in these works did not aim to explicitly  
388 dissociate the behaviorally relevant parts of neural dynamics. Here, PSID revealed a markedly lower dimension for  
389 the behaviorally relevant neural dynamics of around 4, which was significantly lower than the dimension of 12-30  
390 implied by the standard NDM approach (Fig. 3). This result demonstrates the utility of PSID in accurately  
391 estimating the dimensionality of behaviorally relevant neural dynamics, which is a fundamental sought-after  
392 question across domains of neuroscience<sup>3,13,19</sup>.

393 For datasets with discrete classes of behavioral conditions, several non-dynamic dimensionality reduction  
394 methods such as linear discriminant analysis (LDA)<sup>16</sup> and demixed principal component analysis (dPCA)<sup>25</sup> can  
395 take the discrete behavior classes into account and find a low dimensional projection of neural activity that is  
396 suitable for dissociating those classes<sup>16</sup>. However, unlike PSID, these methods are not applicable to continuous  
397 behavioral measurements such as movements. Further these methods cannot learn dynamic models and hence do  
398 not model the temporal patterns of neural activity or aggregate information over time, which is important  
399 especially in studying temporally structured behaviors such as unconstrained movements<sup>2,23</sup> or speech<sup>4</sup>. Thus,  
400 PSID is a unique method that can enable dynamic dimensionality reduction by modeling temporal structure in

401 neural population activity, apply to continuous valued behavioral measurements, and extract behaviorally relevant  
402 low-dimensional representations (i.e. latent states) for neural activity.

403 PSID uses a linear state-space model formulation in which both the latent state dynamics and the observation  
404 model are defined as linear functions of the latent state. A linear observation model is suitable for modeling  
405 continuous-valued observations such as the log-power features extracted from LFP signals in this work<sup>5,29,32,37</sup>. For  
406 spiking activity, some prior works have used a linear observation model with the spike counts in time windows of  
407 various lengths taken as the observation<sup>2,21,23</sup>, for which PSID is readily applicable. More recent studies have shown  
408 that using a GLDS framework with a nonlinear point process observation model for the binary spike events could  
409 provide a more accurate mathematical model in BMIs<sup>38,39</sup>. A variation of NDM using SID has been developed for  
410 GLDS models<sup>34</sup> and an interesting area of future investigation is to generalize PSID to enable learning GLDS  
411 models with behaviorally relevant latent states from binary spike events. Moreover, given the growing interest in  
412 multi-scale modeling of simultaneous spike-field activity<sup>29,37,40,41</sup>, developing a multiscale version of PSID that can  
413 model observations from multiple modalities and timescales together would be another interesting area of future  
414 investigation.

415 In addition to serving as a new method to investigate the neural mechanisms of behavior, PSID may also help  
416 with future neurotechnologies for decoding and modulating behaviorally relevant brain states such as BMIs or  
417 closed-loop deep brain stimulation (DBS) systems<sup>7</sup>. While the motor representations in our datasets were strong,  
418 PSID could still help with decoding of behavior regardless of the latent state dimension. This decoding benefit  
419 may be even greater for brain states that are less strongly encoded or require recording neural activity from a more  
420 distributed brain network that is involved in various functions and thus exhibits more behaviorally irrelevant  
421 dynamics<sup>3,9,12,42</sup>. Further, PSID was able to identify a markedly lower-dimensional state that achieved close to  
422 maximal decoding accuracy. The identification of this low-dimensional behaviorally relevant state will be critical  
423 for developing model-based controllers<sup>43</sup> to modulate various brain functions with electrical or optogenetic



424 stimulation. This is because controllers designed for models with lower-dimensional states are generally more  
425 robust<sup>44</sup>. Finally, developing adaptive methods for latent state-space models that can track changes in behaviorally  
426 relevant dynamics, for example due to learning or stimulation-induced plasticity<sup>2,45-48</sup>, and can appropriately select  
427 the learning rate<sup>49</sup> during adaptation are important future directions.

428 Here we described PSID as a tool for extracting and modeling behaviorally relevant dynamics from neural  
429 activity. In this application, neural activity is taken as the primary signal and behavior is taken as a secondary  
430 signal encoded by the primary signal. While this is the typical scenario of interest in neuroscience and neural  
431 engineering, the mathematical derivation of PSID does not depend on the nature of the two signals (Methods).  
432 For example, one could take behavior as the primary signal and neural activity as the secondary signal. If so, PSID  
433 would extract neural-activity-related dynamics from behavior and optionally also identify any additional  
434 behavioral dynamics not encoded in the recorded neural activity. Indeed, all numerical simulations reported in  
435 this work could be interpreted as having either neural activity or behavior as the primary signal and the other as  
436 the secondary signal. Beyond that, the two signals could even be generated by completely different sources. For  
437 example, in studying interpersonal neural and behavioral synchrony<sup>50</sup> and social behavior<sup>10</sup>, applying PSID to  
438 neural and/or behavioral signals that are synchronously recorded from two individuals may enable extraction and  
439 modeling of common dynamics between the two. In general, when signals acquired from two systems are  
440 suspected to have shared dynamics (e.g. because they may be driven by common dynamic inputs), PSID can be  
441 used to extract and model the shared dynamics.

442 Taken together, the novel PSID modeling algorithm introduced in this work can serve as a tool to advance our  
443 understanding of how behaviorally observable brain functions are encoded in neural activity across broad tasks  
444 and brain regions. Also, PSID may prove to be particularly beneficial in studies of less strongly encoded brain  
445 functions involved in emotion, memory, and social behaviors.

## 446 **Methods**

### 447 **Dynamic model**

#### 448 ***Model formulation***

449 We used a linear state space dynamic model to describe the temporal evolution of neural activity and behavior  
 450 as:

$$\begin{cases} x_{k+1}^s = A x_k^s + w_k \\ y_k = C_y x_k^s + v_k \\ z_k = C_z x_k^s + \epsilon_k \end{cases} \quad (2)$$

451 Here,  $k$  specifies the time index,  $y_k \in \mathbb{R}^{n_y}$  is the recorded neural activity,  $z_k \in \mathbb{R}^{n_z}$  is the behavior (e.g.,  
 452 movement kinematics),  $x_k^s \in \mathbb{R}^{n_x}$  is the latent dynamic state variable that drives the recorded neural activity  $y_k$   
 453 and can also drive the behavior  $z_k$ ,  $\epsilon_k \in \mathbb{R}^{n_z}$  is a random process representing the dynamics in behavior that are  
 454 not present in the recorded neural activity, and  $w_k \in \mathbb{R}^{n_x}$ ,  $v_k \in \mathbb{R}^{n_y}$  are zero-mean white noises that are  
 455 independent of  $x_k^s$ , i.e.  $\mathbf{E}\{x_k^s w_k^T\} = 0$  and  $\mathbf{E}\{x_k^s v_k^T\} = 0$  with the following cross-correlations:

$$\mathbf{E} \left\{ \begin{bmatrix} w_k \\ v_k \end{bmatrix} \begin{bmatrix} w_k^T & v_k^T \end{bmatrix} \right\} \triangleq \begin{bmatrix} Q & S \\ S^T & R \end{bmatrix}. \quad (3)$$

456  $\epsilon_k$  is a general random process denoting the variations of  $z_k$  that are not generated by  $x_k^s$  and thus are not present  
 457 in the recorded neural activity. Thus, we only assume that  $\epsilon_k$  is zero-mean and independent of  $x_k^s$ , i.e.  $\mathbf{E}\{x_k^s \epsilon_k^T\} =$   
 458  $0$  and the other noises, i.e.  $\mathbf{E}\{w_{k'} \epsilon_k^T\} = 0$  and  $\mathbf{E}\{v_{k'} \epsilon_k^T\} = 0$  for any  $k'$ , but we do not make any assumptions  
 459 about the dynamics of  $\epsilon_k$ . In fact,  $\epsilon_k$  does not need to be white and can be any general non-white (colored)  
 460 random process. Note that  $\epsilon_k$  is also independent of  $y_k$  (since it is independent of  $x_k^s$  and  $v_k$ ), thus observing  $y_k$   
 461 does not provide any information about  $\epsilon_k$ . Due to the zero-mean assumption for noise statistics, it is easy to  
 462 show that  $x_k^s$ ,  $y_k$ , and  $z_k$  are also zero-mean, implying that in preprocessing, the mean of  $y_k$  and  $z_k$  should be  
 463 subtracted from them and later added back to any model predictions if needed. The parameters  $(A, C_y, C_z, Q, R, S)$   
 464 fully specify the model in equation (2) (if statistical properties of  $\epsilon_k$  are also of interest, another set of latent state-  
 465 space parameters can be used to model it, Supplementary Note 1). There are other sets of parameters that can also

466 equivalently and fully specify the model; Specifically, the set of parameters  $(A, C_y, C_z, G_y, \Sigma_y, \Sigma_x)$  with  $G_y \triangleq$   
 467  $E\{x_{k+1}^s y_k^T\}$ ,  $\Sigma_y \triangleq E\{y_k y_k^T\}$ , and  $\Sigma_x \triangleq E\{x_k^s x_k^{sT}\}$  can also fully characterize the model and is more suitable for  
 468 evaluating learning algorithms (Supplementary Note 2).

469 ***Definition of behaviorally relevant and behaviorally irrelevant latent states***

470  $x_k^s$  is a latent state that represents all dynamics in the neural activity  $y_k$ , which could be due to various internal  
 471 brain processes including the brain function of interest, other brain functions, or internal states. Without loss of  
 472 generality, it can be shown (Supplementary Note 3) that equation (2) can be equivalently written in a different  
 473 basis as

$$\begin{cases} \begin{bmatrix} x_{k+1}^{(1)} \\ x_{k+1}^{(2)} \end{bmatrix} = \begin{bmatrix} A_{11} & 0 \\ A_{21} & A_{22} \end{bmatrix} \begin{bmatrix} x_k^{(1)} \\ x_k^{(2)} \end{bmatrix} + \begin{bmatrix} w_k^{(1)} \\ w_k^{(2)} \end{bmatrix} \\ y_k = [C_{y_1} \quad C_{y_2}] \begin{bmatrix} x_k^{(1)} \\ x_k^{(2)} \end{bmatrix} + v_k \\ z_k = [C_{z_1} \quad 0] \begin{bmatrix} x_k^{(1)} \\ x_k^{(2)} \end{bmatrix} + \epsilon_k \end{cases}, \quad x_k = \begin{bmatrix} x_k^{(1)} \\ x_k^{(2)} \end{bmatrix}. \quad (4)$$

474 where  $x_k^{(1)} \in \mathbb{R}^{n_1}$  is the minimal set of states that affect behavior and whose dimension  $n_1$  is the rank of the  
 475 behavior observability matrix (equation (42)). Thus, we refer to  $x_k^{(1)}$  as the behaviorally relevant latent states and  
 476  $x_k^{(2)} \in \mathbb{R}^{n_2}$  with  $n_2 = n_x - n_1$  as the behaviorally irrelevant latent states. We interchangeably refer to the  
 477 dimension of the latent states as the number of latent states (e.g.  $n_x$  is the total number of latent states or the total  
 478 latent state dimension).

479 Equation (4) presents a general formulation of which special cases also include the models used in neural  
 480 dynamics modeling (NDM) and representational modeling (RM). If we assume that all latent states can contribute  
 481 to behavior ( $n_1 = n_x$  and  $n_2 = 0$ ), equation (4) reduces to the linear SSM typically used to model the dynamics of  
 482 neural activity in NDM<sup>5,21,30,32,43</sup>. If we further take  $C_z$  to be the identity matrix and  $\epsilon_k = 0$ , the state will be set to  
 483 the behavior  $z_k$  and equation (4) reduces to the linear SSMs used in RM<sup>2,23</sup>. Thus, if the assumptions of standard

484 NDM (i.e. all latent states can drive both neural activity and behavior) or RM (i.e. behavior drives neural activity)  
485 hold better for a given dataset, PSID would still identify these standard models because the solution would still fall  
486 within the model in equation (4) used by PSID.

### 487 ***The learning problem***

488 In the general learning problem, given training time series  $\{y_k: 0 \leq k < N\}$  and  $\{z_k: 0 \leq k < N\}$ , the aim is to  
489 find the dimension of the latent state  $n_x$  and all model parameters  $(A, C_y, C_z, G_y, \Sigma_y, \Sigma_x)$  that generate the data  
490 according to equation (2) or equivalently equation (4). Unlike prior work, here we critically require an  
491 identification algorithm that can dissociate the behaviorally relevant and irrelevant latent states, and can prioritize  
492 identification of the behaviorally relevant latent states (i.e.  $x_k^{(1)}$  from equation (4)). Prioritizing behaviorally  
493 relevant latent states means that the algorithm would include the behaviorally relevant latent states in the model  
494 even when performing dimensionality reduction and thus identifying a model with fewer states than the true  $n_x$ ;  
495 this is typically the case given that training data is limited and neural dynamics are complex.

### 496 ***The decoding problem***

497 Given the model parameters, the prediction (or decoding) problem is to provide the best estimate of  $z_{k+1}$  given  
498 the past neural activity  $\{y_n: 0 \leq n \leq k\}$ . Given the linear state-space formulation of equation (2) and to achieve  
499 the minimum mean-square error, the best prediction of  $y_{k+1}$  using  $y_1$  to  $y_k$  and similarly the best prediction of  
500  $z_{k+1}$  using  $y_1$  to  $y_k$ —which we denote as  $\hat{y}_{k+1|k}$  and  $\hat{z}_{k+1|k}$ , respectively—are obtained with the well-known  
501 recursive Kalman filter<sup>51</sup> (Supplementary Note 4). By reformulating equation (2) to describe neural activity and  
502 behavior in terms of the latent states estimated by the Kalman filter, we can show that the best prediction of  
503 behavior using past neural activity is a linear function of the past neural activity (Supplementary Note 4). This key  
504 insight enables us to identify the model parameters via a direct estimation of the latent states through a projection  
505 of the future behavior onto the past neural activity (Supplementary Note 5).

## 506 **PSID: preferential subspace identification**

507 We develop a novel learning algorithm, named preferential subspace identification (PSID), to identify the  
508 parameters of the dynamic model in equation (4) using training time series  $\{y_k: 0 \leq k < N\}$  and  $\{z_k: 0 \leq k < N\}$   
509 while prioritizing the learning of the dynamics of  $z_k$  that are predictable from  $y_k$ . The full algorithm is provided in  
510 Table 1. The detailed derivation is provided in Supplementary Note 5. In this section, we provide an overview of  
511 the derivation.

512 PSID first extracts the latent states directly using the neural activity and behavior data, and then estimates the  
513 model parameters using the extracted latent states. The latent states are extracted in two stages: the first stage  
514 extracts behaviorally relevant latent states and the second stage, which is optional, extracts the remaining  
515 behaviorally irrelevant latent states. The first stage of PSID projects the future behavior ( $Z_f$ ) onto the past neural  
516 activity ( $Y_p$ ) (denoted as  $Z_f/Y_p$  in Fig. 1b, equation (7)), which we can show extracts the behaviorally relevant  
517 latent states (Supplementary Note 5). The second stage of PSID first finds the part of the future neural activity that  
518 is not explained by the extracted behaviorally relevant latent states, i.e., does not lie in the subspace spanned by  
519 these states. This is found by subtracting the orthogonal projection of future neural activity onto the extracted  
520 behaviorally relevant latent states (equation (18)). This second stage then projects this unexplained future neural  
521 activity onto the past neural activity to extract the behaviorally irrelevant latent states (equation (19)). Overall,  
522 PSID provides a non-iterative closed-form solution for estimating the parameters of the model in equation (4)  
523 (Supplementary Note 5).

### **Table 1. PSID: Preferential subspace identification algorithm.**

Given the training time series  $\{y_k: 0 \leq k < N\}$  and  $\{z_k: 0 \leq k < N\}$ , state dimension  $n_x$  and parameters  $n_1 \leq n_x$  (number of states extracted in the first stage) and  $i$  (projection horizon), this algorithm identifies parameters of a dynamic linear state-space model as in equation (4).

1. Form the following matrices ( $j = N - 2i + 1$  is the number of columns in these matrices):

$$\begin{bmatrix} Y_p \\ - \\ Y_f \end{bmatrix} \triangleq \begin{bmatrix} y_0 & y_1 & \cdots & y_{j-1} \\ y_1 & y_2 & \cdots & y_j \\ \vdots & \vdots & \ddots & \vdots \\ y_{i-1} & y_i & \cdots & y_{j+i-1} \\ \hline y_i & y_{i+1} & \cdots & y_{j+i} \\ \hline y_{i+1} & y_{i+2} & \cdots & y_{j+i+1} \\ \vdots & \vdots & \ddots & \vdots \\ y_{2i-1} & y_{2i} & \cdots & y_{j+2i-1} \end{bmatrix} = \begin{bmatrix} y_0 & y_1 & \cdots & y_{j-1} \\ y_1 & y_2 & \cdots & y_j \\ \vdots & \vdots & \ddots & \vdots \\ y_{i-1} & y_i & \cdots & y_{j+i-1} \\ \hline y_i & y_{i+1} & \cdots & y_{j+i} \\ \hline y_{i+1} & y_{i+2} & \cdots & y_{j+i+1} \\ \vdots & \vdots & \ddots & \vdots \\ y_{2i-1} & y_{2i} & \cdots & y_{j+2i-1} \end{bmatrix} \triangleq \begin{bmatrix} Y_p^+ \\ - \\ Y_f^- \end{bmatrix} \triangleq \begin{bmatrix} Y_p \\ - \\ Y_i \\ - \\ Y_f^- \end{bmatrix} \quad (5)$$

$$\begin{bmatrix} Z_p \\ - \\ Z_f \end{bmatrix} \triangleq \begin{bmatrix} z_0 & z_1 & \cdots & z_{j-1} \\ z_1 & z_2 & \cdots & z_j \\ \vdots & \vdots & \ddots & \vdots \\ z_{i-1} & z_i & \cdots & z_{j+i-1} \\ \hline z_i & z_{i+1} & \cdots & z_{j+i} \\ \hline z_{i+1} & z_{i+2} & \cdots & z_{j+i+1} \\ \vdots & \vdots & \ddots & \vdots \\ z_{2i-1} & z_{2i} & \cdots & z_{j+2i-1} \end{bmatrix} = \begin{bmatrix} z_0 & z_1 & \cdots & z_{j-1} \\ z_1 & z_2 & \cdots & z_j \\ \vdots & \vdots & \ddots & \vdots \\ z_{i-1} & z_i & \cdots & z_{j+i-1} \\ \hline z_i & z_{i+1} & \cdots & z_{j+i} \\ \hline z_{i+1} & z_{i+2} & \cdots & z_{j+i+1} \\ \vdots & \vdots & \ddots & \vdots \\ z_{2i-1} & z_{2i} & \cdots & z_{j+2i-1} \end{bmatrix} \triangleq \begin{bmatrix} Z_p^+ \\ - \\ Z_f^- \end{bmatrix} \triangleq \begin{bmatrix} Z_p \\ - \\ Z_i \\ - \\ Z_f^- \end{bmatrix} \quad (6)$$

2. If  $n_1 = 0$  (no behaviorally relevant latent states), skip to step 9
3. [Begins stage 1 of PSID]: Compute the least squares prediction of  $Z_f$  from  $Y_p$ , and  $Z_f^-$  from  $Y_p^+$  as:

$$\hat{Z}_f = Z_f Y_p^T (Y_p Y_p^T)^{-1} Y_p \quad (7)$$

$$\hat{Z}_f^- = Z_f^- Y_p^{+T} (Y_p^+ Y_p^{+T})^{-1} Y_p^+ \quad (8)$$

4. Compute the singular value decomposition (SVD) of  $\hat{Z}_f$  and keep the top  $n_1$  singular values:

$$\hat{Z}_f = USV^T \cong U_1 S_1 V_1^T \quad (9)$$

5. Compute the behavior observability matrix  $\Gamma_{z_i}$  and the behaviorally relevant latent state  $\hat{X}_i^{(1)}$  as ( $\dagger$  denotes pseudoinverse):

$$\Gamma_{z_i} = U_1 S_1^2 \quad (10)$$

$$\hat{X}_i^{(1)} = \Gamma_{z_i}^\dagger \hat{Z}_f \quad (11)$$

6. Remove the last  $n_z$  rows of  $\Gamma_{z_i}$  to get  $\Gamma_{z_{i-1}}$  and then compute the behaviorally relevant latent state at the next time step ( $\hat{X}_{i+1}^{(1)}$ ) as:

$$\Gamma_{z_{i-1}} = \Gamma_{z_i(1:(i-1) \times n_z, :)} \quad (12)$$

$$\hat{X}_{i+1}^{(1)} = \Gamma_{z_{i-1}}^\dagger \hat{Z}_f^- \quad (13)$$

7. Compute the least squares estimate of  $A_{11}$  using the latent states as:

$$A_{11} = \hat{X}_{i+1}^{(1)} \hat{X}_i^{(1)\dagger} \quad (14)$$

8. If  $n_x = n_1$  (no additional states), set  $A = A_{11}$ ,  $\hat{X}_i = \hat{X}_i^{(1)}$  and  $\hat{X}_{i+1} = \hat{X}_{i+1}^{(1)}$  and skip to step 17
9. [Begins stage 2 of PSID]: If  $n_1 > 0$ , find the neural observability matrix  $\Gamma_{y_i}^{(1)}$  for  $\hat{X}_i^{(1)}$  as the least squares solution of predicting  $Y_f$  using  $\hat{X}_i^{(1)}$ , and subtract this prediction from  $Y_f$  (otherwise set  $Y_f' = Y_f$ ).

$$\Gamma_{y_i}^{(1)} = Y_f \hat{X}_i^{(1)T} \left( \hat{X}_i^{(1)} \hat{X}_i^{(1)T} \right)^{-1} \quad (15)$$

$$Y_f' = Y_f - \Gamma_{y_i}^{(1)} \hat{X}_i^{(1)} \quad (16)$$

10. If  $n_1 > 0$ , remove the last  $n_y$  rows of  $\Gamma_{y_i}^{(1)}$  to find the neural observability matrix for  $\hat{X}_{i+1}^{(1)}$  and subtract the corresponding prediction from  $Y_f^-$  (otherwise set  $Y_f^{-'} = Y_f^-$ ).

$$\Gamma_{y_{i-1}}^{(1)} = \Gamma_{y_i}^{(1)} \quad (1:(i-1) \times n_y, :) \quad (17)$$

$$Y_f^{-'} = Y_f^- - \Gamma_{y_{i-1}}^{(1)} \hat{X}_{i+1}^{(1)} \quad (18)$$

11. Compute the least squares prediction of  $Y_f'$  from  $Y_p$ , and  $Y_f^{-'}$  from  $Y_p^+$  as:

$$\hat{Y}_f' = Y_f' Y_p^T (Y_p Y_p^T)^{-1} Y_p \quad (19)$$

$$\hat{Y}_f^{-'} = Y_f^{-'} Y_p^{+T} (Y_p^+ Y_p^{+T})^{-1} Y_p^+ \quad (20)$$

12. Compute the SVD of  $\hat{Y}_f'$  and keep the top  $n_2 = n_x - n_1$  singular values:

$$\hat{Y}_f' = U' S' V'^T \cong U_2 S_2 V_2^T \quad (21)$$

13. Compute the remaining neural observability matrix  $\Gamma_{y_i}$  and the corresponding latent state  $\hat{X}_i^{(2)}$  as:

$$\Gamma_{y_i} = U_2 S_2^{\frac{1}{2}} \quad (22)$$

$$\hat{X}_i^{(2)} = \Gamma_{y_i}^\dagger \hat{Y}_f' \quad (23)$$

14. Remove the last  $n_y$  rows of  $\Gamma_{y_i}$  to get  $\Gamma_{y_{i-1}}$  and then compute the remaining latent states at the next time step ( $\hat{X}_{i+1}^{(2)}$ ) as:

$$\Gamma_{y_{i-1}} = \Gamma_{y_i} \quad (1:(i-1) \times n_y, :) \quad (24)$$

$$\hat{X}_{i+1}^{(2)} = \Gamma_{y_{i-1}}^\dagger \hat{Y}_f^{-'} \quad (25)$$

15. If  $n_1 > 0$ , concatenate  $\hat{X}_i^{(2)}$  to  $\hat{X}_i^{(1)}$  and  $\hat{X}_{i+1}^{(2)}$  to  $\hat{X}_{i+1}^{(1)}$  to get the full latent state (otherwise set  $\hat{X}_i = \hat{X}_i^{(2)}$  and  $\hat{X}_{i+1} = \hat{X}_{i+1}^{(2)}$ ):

$$\hat{X}_i = \begin{bmatrix} \hat{X}_i^{(1)} \\ \hat{X}_i^{(2)} \end{bmatrix}, \quad \hat{X}_{i+1} = \begin{bmatrix} \hat{X}_{i+1}^{(1)} \\ \hat{X}_{i+1}^{(2)} \end{bmatrix} \quad (26)$$

16. Compute the least squares estimate of  $A_{21}$  and  $A_{22}$  using the latent states and form the full  $A$  as:

$$[A_{12} \quad A_{22}] = \hat{X}_{i+1}^{(2)} \hat{X}_i^\dagger \quad (27)$$

$$A = \begin{bmatrix} A_{11} & \\ A_{12} & A_{22} \end{bmatrix} \quad (28)$$

17. Compute the least squares estimate of  $C_y$  and  $C_z$  using the latent states and the observations as:

$$C_y = Y_i \hat{X}_i^\dagger \quad (29)$$

$$C_z = Z_i \hat{X}_i^\dagger \quad (30)$$

18. Compute the residuals as:

$$\begin{bmatrix} W_i \\ V_i \end{bmatrix} = \begin{bmatrix} \hat{X}_{i+1} \\ Y_i \end{bmatrix} - \begin{bmatrix} A \\ C_y \end{bmatrix} \hat{X}_i \quad (31)$$

19. Compute the noise statistics as the sample covariance of the residuals:

$$\begin{bmatrix} Q & S \\ S^T & R \end{bmatrix} = \frac{1}{j} \begin{bmatrix} W_i \\ V_i \end{bmatrix} \begin{bmatrix} W_i \\ V_i \end{bmatrix}^T \quad (32)$$

20. Solve equation (46) to find the steady-state solution  $\bar{P}$ , and substitute  $\bar{P}$  in equation (45) to get the steady-state Kalman gain  $K$ .

21. If parameters  $\Sigma_y$  and  $G_y$  are of interest, solve the Lyapunov equation (37) to get  $\Sigma_x$ , and then use equations (38) and (39) to compute  $\Sigma_y$  and  $G_y$ , respectively. These parameters are not needed for Kalman filtering or for decoding behavior from neural activity (equation (44)).

524

## 525 Identification of model structure parameters for PSID and NDM

526 For both PSID and NDM, the total number of latent states  $n_x$  is a parameter of the model structure. When  
 527 learning of all dynamics in the neural activity (regardless of their relevance to behavior) is of interest, we estimate  
 528 the appropriate value for this parameter using the following cross-validation procedure. We fit models with  
 529 different values of  $n_x$  and for each model, we compute the cross-validated accuracy of one-step-ahead prediction  
 530 of neural activity  $y_k$  using its past (equation (44) in Supplementary Note 4). This is referred to as neural self-  
 531 prediction to emphasize that the input is the past neural activity itself, which is used to predict the value of neural  
 532 activity at the current time step. We use Pearson's correlation coefficient (CC) to quantify the self-prediction  
 533 (averaged across dimensions of neural activity). We then estimate the total neural latent state dimension  $n_x$  as the  
 534 value that reaches within 1 s.e.m. of the best possible neural self-prediction accuracy among all considered latent  
 535 state dimensions. As shown with numerical simulations, using this approach with PSID or standard SID<sup>33,51</sup> for



536 NDM accurately identifies the total number of latent states (Supplementary Fig. 3a-c and Supplementary Fig. 5c,  
537 e). We thus use this procedure to quantify the total neural dynamics dimension in NHP data (Fig. 3d, j). We also  
538 use the exact same procedure on the behavioral data using the behavior self-prediction to quantify the total  
539 behavior dynamics dimension in NHP data (Fig. 3e, k).

540 To learn a model with PSID with a given latent state dimension  $n_x$ , we also need to specify another model  
541 structure parameter  $n_1$ , i.e. the dimension of  $x_k^{(1)}$  in equation (4). To determine a suitable value for  $n_1$ , we  
542 perform an inner cross-validation within the training data and fit models with the given  $n_x$  and with different  
543 candidate values for  $n_1$ . Among considered values for  $n_1$ , we select the final value  $n_1^*$  as the value of  $n_1$  that within  
544 the inner cross-validation in the training data, maximizes the accuracy for decoding behavior using neural activity  
545 (equation (44) in Supplementary Note 4). We quantify the decoding accuracy using CC (averaged across  
546 dimensions of behavior). As shown with numerical simulations, this approach accurately identifies  $n_1$   
547 (Supplementary Fig. 3d, e). Thus, when fitting a model with any given latent state dimension  $n_x$  using PSID,  
548 unless otherwise noted, we determine  $n_1$  using an inner cross-validation as detailed above (Fig. 3a-c,  
549 Supplementary Fig. 5a, Supplementary Fig. 3a).

## 550 **Generating random models for numerical simulations**

551 To validate the identification algorithms with numerical simulations, we generate random models with the  
552 following procedure. Dimension of  $y_k$  and  $z_k$  are selected randomly with uniform probability from the following  
553 ranges:  $5 \leq n_y, n_z \leq 10$ . The full latent state dimension is selected with uniform probability from  $1 \leq n_x \leq 10$   
554 and then the number of states driving behavior ( $n_1$ ) is selected with uniform probability from  $1 \leq n_1 \leq n_x$ . We  
555 then randomly generate matrices with consistent dimensions to be used as the model parameters  $A, C_y, C_z, Q, R, S$   
556 (Supplementary Note 7). Specifically, the eigenvalues of  $A$  are selected randomly from the unit circle and  $n_1$  of  
557 them are then randomly selected to be used in the behaviorally relevant part of  $A$  (i.e.  $A_{11}$  in equation (4),  
558 Supplementary Note 7). Furthermore, noise statistics are randomly generated and then scaled with random values

559 to provide a wide range of relative state and observation noise values (Supplementary Note 7). Finally, we generate  
560 a separate randomly generated SSM with a random number of latent states as the model for the independent  
561 residual behavior dynamics  $\epsilon_k$  (Supplementary Note 7).

562 To generate a time-series realization with  $N$  data points from a given model, we first randomly generate an  $N$   
563 data point white gaussian noise with the covariance given in equation (62) and assign these random numbers to  
564  $w_k$  and  $v_k$ . We then compute  $x_k$  and  $y_k$  by iterating through equation (2) with the initial value  $x_{-1} = 0$ . Finally,  
565 we generate a completely independent  $N$ -point time-series realization from the behavior residual dynamics model  
566 (see the previous paragraph) and add its generated behavior time series (i.e.  $\epsilon_k$ ) to  $C_z x_k$  to get the total  $z_k$   
567 (equation (2)).

## 568 **Evaluation metrics for learning of model parameters in numerical simulations**

569 A similarity transform is a revertible transformation of the basis in which states of the model are described and  
570 can be achieved by multiplying the states with any invertible matrix (Supplementary Note 2). For example, any  
571 permutation of the states is a similarity transform. Since any similarity transform on the model gives an equivalent  
572 model for the same neural activity and behavior (just changes the latent state basis in which we describe the  
573 model; Supplementary Note 2), we cannot directly compare the parameters of the identified model with the true  
574 model and need to consider all similarity transforms of the identified model as well. Thus, to evaluate the  
575 identification of model parameters, we first find a similarity transform that makes the basis of the latent states for  
576 the identified model as close as possible to the basis of the latent states for the true model. We then evaluate the  
577 difference between the identified and true values of each model parameter. Purely to find such a similarity  
578 transform, from the true model we generate a new realization with  $q = 1000n_x$  samples, which is taken to be  
579 sufficiently long for the model dynamics to be reflected in the states. We then use both the true and the identified  
580 models to estimate the latent state using the steady-state Kalman filter (equation (44)) associated with each model,

581 namely  $\hat{x}_{k+1|k}^{(true)}$  and  $\hat{x}_{k+1|k}^{(id)}$ . We then find the similarity transform that minimizes the mean-squared error between  
 582 the two sets of Kalman estimated states as

$$\hat{T} = \underset{T}{\operatorname{argmin}} \left( \sum_{k=1}^q \left| T \hat{x}_{k+1|k}^{(id)} - \hat{x}_{k+1|k}^{(true)} \right|^2 \right) = \hat{X}^{(true)} \hat{X}^{(id)\dagger} \quad (33)$$

583 where  $\hat{X}^{(true)}$  and  $\hat{X}^{(id)}$  are matrices whose  $k$ th column is composed of  $\hat{x}_{k+1|k}^{(true)}$  and  $\hat{x}_{k+1|k}^{(id)}$ , respectively. We then  
 584 apply the similarity transform  $\hat{T}$  to the parameters of the identified model to get an equivalent model in the same  
 585 basis as the true model. We emphasize again that the identified model and the model obtained from it using the  
 586 above similarity transform are equivalent (Supplementary Note 2).

587 Given the true model and the transformed identified model, we quantify the identification error for each model  
 588 parameter  $\Psi$  (e.g.  $C_y$ ) using the normalized matrix norm as:

$$e_{\Psi} = \frac{|\Psi^{(id)} - \Psi^{(true)}|_F}{|\Psi^{(true)}|_F} \quad (34)$$

589 where  $|\cdot|_F$  denotes the Frobenius norm of a matrix, which for any matrix  $\Psi = [\psi_{ij}]_{n \times m}$  is defined as:

$$|\Psi|_F = \sqrt{\sum_{i=1}^n \sum_{j=1}^m |\psi_{ij}|^2}. \quad (35)$$

590 This concludes the evaluation of the identified model parameters.

## 591 **Evaluation metrics for learning of behaviorally relevant dynamics in numerical simulations**

592 Both for numerical simulations and for NHP data, we use the cross-validated accuracy of decoding behavior  
 593 using neural activity as a measure of how accurately the behaviorally relevant neural dynamics are learned. In  
 594 numerical simulations, we also evaluate a more direct metric based on the eigenvalues of the state transition  
 595 matrix  $A$ ; this is because for a linear SSM, these eigenvalues specify the dynamical characteristics<sup>52</sup>. Specifically, we  
 596 evaluate the identification accuracy for the eigenvalues associated with the behaviorally relevant latent states (i.e.  
 597 eigenvalues of  $A_{11}$  in equation (4)). PSID identifies the model in the form of equation (4) and arranges the latent

598 states such that the first block of  $A$  (i.e.  $A_{11}$  in equation (28)) is associated with the behaviorally relevant states  
599 ( $x_k^{(1)}$  in equation (4)). Thus for PSID, we simply compute the eigenvalues of  $A_{11}$  and evaluate their identification  
600 accuracy. NDM identification methods do not specify which states are behaviorally relevant. So to find these  
601 states, we first apply a similarity transform to make the NDM identified  $A$  matrix block-diagonal with each  
602 complex conjugate pair of eigenvalues in a separate block (using MATLAB's `bdschur` command followed by the  
603 `cdf2rdf` command). We then fit a linear regression from the states associated with each block to the behavior  
604 (using the training data) and sort the blocks by their prediction accuracy of behavior  $z_k$ . The behaviorally relevant  
605 eigenvalues are then taken to be the top  $n_1$  eigenvalues that result in the most accurate prediction of  $z_k$ .

606 Finally, given the true behaviorally relevant eigenvalues and the identified behaviorally relevant eigenvalues, we  
607 find the closest pairing of the two sets (by comparing all possible pairings), put the true and the associated closest  
608 identified eigenvalues in two vectors, and compute the normalized eigen value detection error using equation (34).

609 When evaluating the identified eigenvalues for models with a latent state dimension that is smaller than the true  
610  $n_1$  (for example in Fig. 2), we add zeros instead of the missing eigenvalues since a model with fewer latent states is  
611 equivalent to a model with more latent states that are always equal to zero and have eigenvalues of zero associated  
612 with them.

### 613 **Identification of the dimensionality for behaviorally relevant neural dynamics**

614 To estimate the dimensionality of the behaviorally relevant neural dynamics, we seek to find the minimal  
615 number (i.e., dimension) of latent states that is sufficient to best describe behavior using neural activity. To do  
616 this, for each method, we fit models with different values of state dimension  $n_x$ , and compute the cross-validated  
617 accuracy of decoding behavior using neural activity (equation (44) in Supplementary Note 4). We use Pearson's  
618 correlation coefficient (CC), averaged across behavior dimensions, to quantify the decoding accuracy. We then  
619 estimate the dimension of the behaviorally relevant neural dynamics as the smallest latent state dimension that  
620 reaches within 1 s.e.m. of the best possible cross-validated decoding accuracy among all considered latent states

621 the smallest latent state dimension that reaches within 1 s.e.m. of the best possible cross-validated behavior  
622 decoding accuracy as described above (Fig. 3a-c).

### 623 **Recordings and task setup in non-human primates**

624 Neural activity was recorded in two adult Rhesus macaques while the subjects were performing naturalistic  
625 reach, grasp, and return movements in a 3D space<sup>37,53</sup>. All surgical and experimental procedures were performed  
626 in compliance with the National Institute of Health Guide for Care and Use of Laboratory Animals and were  
627 approved by the New York University Institutional Animal Care and Use Committee. In Monkey J, neural activity  
628 was recorded from 137 electrodes on a micro-drive (Gray Matter Research, USA) covering parts of primary motor  
629 cortex (M1), dorsal premotor cortex (PMd), ventral premotor cortex (PMv), and prefrontal cortex (PFC) on the  
630 left hemisphere and in monkey C, activity was recorded from 128 electrodes on four thirty-two electrode  
631 microdrives (Gray Matter Research, USA) covering PMd and PMv on both left and right hemispheres. Using 3D  
632 tracked reflective markers, the movement of various points on the torso, chest, right arm, hand and fingers were  
633 tracked. These markers were used to extract the angle of the 27 (monkey J) or 25 (monkey C) joints of the upper-  
634 extremity, consisting of 7 joints in the shoulder, elbow, wrist, and 20 (monkey J) or 18 (monkey C) joints in  
635 fingers (4 in each, except 2 missing finger joints in monkey C)<sup>53,54</sup>. We analyzed the neural activity during 7  
636 (monkey J) or 4 (monkey C) recording sessions. For most of our analyses (unless otherwise specified), to further  
637 increase the sample size, we randomly divided the electrodes into non-overlapping groups of 10 electrodes and  
638 performed modeling in each group separately. We refer to each random electrode group in each recording session  
639 as one dataset.

640 To model the recorded local field potentials (LFP), we performed common average referencing (CAR) and then  
641 as the neural features, extracted signal log-powers (i.e. in dB units) from 7 frequency bands<sup>37,55</sup> (theta: 4-8 Hz,  
642 alpha: 8-12 Hz, low beta: 12-24 Hz, high beta: 24-34 Hz, low gamma: 34-55 Hz, high-gamma 1: 65-95 Hz, and high  
643 gamma 2: 130-170 Hz) within sliding 300ms windows at a time step of 50ms using Welch's method (using 8 sub

644 windows with 50% overlap)<sup>56</sup>. The extracted features were taken as the neural activity time series  $y_k$  ( $y_k \in \mathbb{R}^{70}$  in  
645 each dataset). Unless otherwise noted, the behavior time series  $z_k$  was taken as the joint angles at the end of each  
646 window ( $z_k \in \mathbb{R}^{27}$  in monkey J and  $z_k \in \mathbb{R}^{25}$  in monkey C).

### 647 **Cross-validated model evaluation and statistical tests on NHP neural datasets**

648 For each method, we performed the model identification and decoding within a 5-fold cross-validation and as  
649 the performance metric for predicting behavior, we computed the cross-validated correlation coefficient between  
650 the true and predicted joint angles. For all methods, in each cross-validation fold, we first z-scored each dimension  
651 of neural activity and behavior based on the training data to ensure that learning methods do not discount any  
652 behavior or neural dimensions due to a potentially smaller natural variance. In fitting the models with PSID, for  
653 each latent dimension  $n_x$ , unless specified otherwise,  $n_1$  was selected using a 4-fold inner cross-validation within  
654 the training data. For PSID and standard SID<sup>33,51</sup>, a horizon parameter of  $i = 5$  was used in all analyses, except for  
655 per channel analyses (Fig. 5) where a horizon of  $i = 20$  was used due to the smaller neural feature dimension. For  
656 the control analyses with NDM, we used the EM algorithm<sup>57,58</sup>.

657 We used the Wilcoxon signed-rank or rank-sum for all paired and non-paired statistical tests, respectively. To  
658 correct for multiple-comparisons when comparing the performance of methods for different joints or channels,  
659 we corrected the P-values within the test data using the False Discovery Rate (FDR) control<sup>59</sup>.

### 660 **Data availability**

661 The data used to support the results are available upon reasonable request from the corresponding author.

### 662 **Code availability**

663 The code for the PSID algorithm is available from the corresponding author and will be available online at

664 <https://github.com/ShanechiLab/PSID>.

## 665 Author contributions

666 O.G.S. and M.M.S. conceived and developed the new PSID algorithm. O.G.S. performed all the analyses. B.P.  
667 provided all the non-human primate data. O.G.S. and M.M.S. wrote the manuscript with input from B.P.

## 668 References

- 669 1. Schwartz, A. B., Cui, X. T., Weber, D. J. & Moran, D. W. Brain-Controlled Interfaces: Movement Restoration  
670 with Neural Prosthetics. *Neuron* **52**, 205–220 (2006).
- 671 2. Shanechi, M. M. Brain–Machine Interface Control Algorithms. *IEEE Trans. Neural Syst. Rehabil. Eng.* **25**,  
672 1725–1734 (2017).
- 673 3. Shenoy, K. V., Sahani, M. & Churchland, M. M. Cortical Control of Arm Movements: A Dynamical Systems  
674 Perspective. *Annu. Rev. Neurosci.* **36**, 337–359 (2013).
- 675 4. Herff, C. & Schultz, T. Automatic Speech Recognition from Neural Signals: A Focused Review. *Front.*  
676 *Neurosci.* **10**, (2016).
- 677 5. Sani, O. G. *et al.* Mood variations decoded from multi-site intracranial human brain activity. *Nat. Biotechnol.*  
678 **36**, 954 (2018).
- 679 6. Mante, V., Sussillo, D., Shenoy, K. V. & Newsome, W. T. Context-dependent computation by recurrent  
680 dynamics in prefrontal cortex. *Nature* **503**, 78–84 (2013).
- 681 7. Hoang, K. B., Cassar, I. R., Grill, W. M. & Turner, D. A. Biomarkers and Stimulation Algorithms for Adaptive  
682 Brain Stimulation. *Front. Neurosci.* **11**, (2017).
- 683 8. Allen, W. E. *et al.* Thirst regulates motivated behavior through modulation of brainwide neural population  
684 dynamics. *Science* **364**, eaav3932 (2019).
- 685 9. Gründemann, J. *et al.* Amygdala ensembles encode behavioral states. *Science* **364**, eaav8736 (2019).
- 686 10. Haroush, K. & Williams, Z. M. Neuronal prediction of opponent’s behavior during cooperative social  
687 interchange in primates. *Cell* **160**, 1233–1245 (2015).
- 688 11. Herzfeld, D. J., Kojima, Y., Soetedjo, R. & Shadmehr, R. Encoding of action by the Purkinje cells of the  
689 cerebellum. *Nature* **526**, 439–442 (2015).

- 690 12. Ramkumar, P., Dekleva, B., Cooler, S., Miller, L. & Kording, K. Premotor and Motor Cortices Encode Reward.  
691 *PLoS ONE* **11**, (2016).
- 692 13. Stringer, C. *et al.* Spontaneous behaviors drive multidimensional, brainwide activity. *Science* **364**, eaav7893  
693 (2019).
- 694 14. Susilaradeya, D. *et al.* Extrinsic and intrinsic dynamics in movement intermittency. *eLife* **8**, e40145 (2019).
- 695 15. Whitmire, C. J., Waiblinger, C., Schwarz, C. & Stanley, G. B. Information Coding through Adaptive Gating of  
696 Synchronized Thalamic Bursting. *Cell Rep.* **14**, 795–807 (2016).
- 697 16. Cunningham, J. P. & Yu, B. M. Dimensionality reduction for large-scale neural recordings. *Nat. Neurosci.* **17**,  
698 1500–1509 (2014).
- 699 17. Gallego, J. A., Perich, M. G., Miller, L. E. & Solla, S. A. Neural Manifolds for the Control of Movement. *Neuron*  
700 **94**, 978–984 (2017).
- 701 18. Remington, E. D., Egger, S. W., Narain, D., Wang, J. & Jazayeri, M. A Dynamical Systems Perspective on  
702 Flexible Motor Timing. *Trends Cogn. Sci.* **22**, 938–952 (2018).
- 703 19. Sadtler, P. T. *et al.* Neural constraints on learning. *Nature* **512**, 423–426 (2014).
- 704 20. Churchland, M. M. *et al.* Neural population dynamics during reaching. *Nature* **487**, 51–56 (2012).
- 705 21. Kao, J. C. *et al.* Single-trial dynamics of motor cortex and their applications to brain-machine interfaces. *Nat.*  
706 *Commun.* **6**, 7759 (2015).
- 707 22. Pandarinath, C. *et al.* Inferring single-trial neural population dynamics using sequential auto-encoders. *Nat.*  
708 *Methods* **15**, 805–815 (2018).
- 709 23. Kao, J. C., Stavisky, S. D., Sussillo, D., Nuyujukian, P. & Shenoy, K. V. Information Systems Opportunities in  
710 Brain–Machine Interface Decoders. *Proc. IEEE* **102**, 666–682 (2014).
- 711 24. Wallis, J. D. Decoding Cognitive Processes from Neural Ensembles. *Trends Cogn. Sci.* **22**, 1091–1102 (2018).
- 712 25. Kobak, D. *et al.* Demixed principal component analysis of neural population data. *eLife* **5**, e10989 (2016).
- 713 26. Kaufman, M. T. *et al.* The Largest Response Component in the Motor Cortex Reflects Movement Timing but  
714 Not Movement Type. *eNeuro* **3**, ENEURO.0085-16.2016 (2016).



- 715 27. Takahashi, K. *et al.* Encoding of Both Reaching and Grasping Kinematics in Dorsal and Ventral Premotor  
716 Cortices. *J. Neurosci.* **37**, 1733–1746 (2017).
- 717 28. Thura, D. & Cisek, P. Deliberation and Commitment in the Premotor and Primary Motor Cortex during  
718 Dynamic Decision Making. *Neuron* **81**, 1401–1416 (2014).
- 719 29. Abbaspourazad, H., Hsieh, H. & Shanechi, M. M. A Multiscale Dynamical Modeling and Identification  
720 Framework for Spike-Field Activity. *IEEE Trans. Neural Syst. Rehabil. Eng.* **27**, 1128–1138 (2019).
- 721 30. Aghagolzadeh, M. & Truccolo, W. Inference and Decoding of Motor Cortex Low-Dimensional Dynamics via  
722 Latent State-Space Models. *IEEE Trans. Neural Syst. Rehabil. Eng.* **24**, 272–282 (2016).
- 723 31. Archer, E. W., Koster, U., Pillow, J. W. & Macke, J. H. Low-dimensional models of neural population activity  
724 in sensory cortical circuits. in *Advances in Neural Information Processing Systems 27* (eds. Ghahramani, Z.,  
725 Welling, M., Cortes, C., Lawrence, N. D. & Weinberger, K. Q.) 343–351 (Curran Associates, Inc., 2014).
- 726 32. Yang, Y., Sani, O. G., Chang, E. F. & Shanechi, M. M. Dynamic network modeling and dimensionality  
727 reduction for human ECoG activity. *J. Neural Eng.* **16**, 056014 (2019).
- 728 33. Van Overschee, P. & De Moor, B. *Subspace Identification for Linear Systems*. (Springer US, 1996).
- 729 34. Buesing, L., Macke, J. H. & Sahani, M. Spectral learning of linear dynamics from generalised-linear  
730 observations with application to neural population data. in *Advances in Neural Information Processing*  
731 *Systems 25* (eds. Pereira, F., Burges, C. J. C., Bottou, L. & Weinberger, K. Q.) 1682–1690 (Curran Associates,  
732 Inc., 2012).
- 733 35. Yu, B. M. *et al.* Gaussian-Process Factor Analysis for Low-Dimensional Single-Trial Analysis of Neural  
734 Population Activity. *J. Neurophysiol.* **102**, 614–635 (2009).
- 735 36. Christophel, T. B., Klink, P. C., Spitzer, B., Roelfsema, P. R. & Haynes, J.-D. The Distributed Nature of Working  
736 Memory. *Trends Cogn. Sci.* **21**, 111–124 (2017).
- 737 37. Hsieh, H.-L., Wong, Y. T., Pesaran, B. & Shanechi, M. M. Multiscale modeling and decoding algorithms for  
738 spike-field activity. *J. Neural Eng.* **16**, 016018 (2018).
- 739 38. Shanechi, M. M. *et al.* Rapid control and feedback rates enhance neuroprosthetic control. *Nat. Commun.* **8**,  
740 13825 (2017).

- 741 39. Shanechi, M. M., Orsborn, A. L. & Carmena, J. M. Robust Brain-Machine Interface Design Using Optimal  
742 Feedback Control Modeling and Adaptive Point Process Filtering. *PLOS Comput. Biol.* **12**, e1004730 (2016).
- 743 40. Bighamian, R., Wong, Y. T., Pesaran, B. & Shanechi, M. M. Sparse model-based estimation of functional  
744 dependence in high-dimensional field and spike multiscale networks. *J. Neural Eng.* (2019).  
745 doi:10.1088/1741-2552/ab225b
- 746 41. Wang, C. & Shanechi, M. M. Estimating Multiscale Direct Causality Graphs in Neural Spike-Field Networks.  
747 *IEEE Trans. Neural Syst. Rehabil. Eng.* **27**, 857–866 (2019).
- 748 42. Svoboda, K. & Li, N. Neural mechanisms of movement planning: motor cortex and beyond. *Curr. Opin.*  
749 *Neurobiol.* **49**, 33–41 (2018).
- 750 43. Yang, Y., Connolly, A. T. & Shanechi, M. M. A control-theoretic system identification framework and a real-  
751 time closed-loop clinical simulation testbed for electrical brain stimulation. *J. Neural Eng.* **15**, 066007 (2018).
- 752 44. Obinata, G. & Anderson, B. D. O. *Model Reduction for Control System Design*. (Springer Science & Business  
753 Media, 2012).
- 754 45. Ahmadipour, P., Yang, Y. & Shanechi, M. M. Investigating the effect of forgetting factor on tracking non-  
755 stationary neural dynamics. in *2019 9th International IEEE/EMBS Conference on Neural Engineering (NER)*  
756 291–294 (2019). doi:10.1109/NER.2019.8717119
- 757 46. Shenoy, K. V. & Carmena, J. M. Combining decoder design and neural adaptation in brain-machine  
758 interfaces. *Neuron* **84**, 665–680 (2014).
- 759 47. Yang, Y. *et al.* Developing a personalized closed-loop controller of medically-induced coma in a rodent  
760 model. *J. Neural Eng.* **16**, 036022 (2019).
- 761 48. Yang, Y., Chang, E. F. & Shanechi, M. M. Dynamic tracking of non-stationarity in human ECoG activity. in  
762 *2017 39th Annual International Conference of the IEEE Engineering in Medicine and Biology Society (EMBC)*  
763 1660–1663 (2017). doi:10.1109/EMBC.2017.8037159
- 764 49. Hsieh, H.-L. & Shanechi, M. M. Optimizing the learning rate for adaptive estimation of neural encoding  
765 models. *PLOS Comput. Biol.* **14**, e1006168 (2018).

- 766 50. Yun, K., Watanabe, K. & Shimojo, S. Interpersonal body and neural synchronization as a marker of implicit  
767 social interaction. *Sci. Rep.* **2**, 959 (2012).
- 768 51. Katayama, T. *Subspace Methods for System Identification*. (Springer Science & Business Media, 2006).
- 769 52. Fu, Z.-F. & He, J. *Modal Analysis*. (Elsevier, 2001).
- 770 53. Wong, Y. T., Putrino, D., Weiss, A. & Pesaran, B. Utilizing movement synergies to improve decoding  
771 performance for a brain machine interface. in *2013 35th Annual International Conference of the IEEE*  
772 *Engineering in Medicine and Biology Society (EMBC)* 289–292 (2013). doi:10.1109/EMBC.2013.6609494
- 773 54. Putrino, D., Wong, Y. T., Weiss, A. & Pesaran, B. A training platform for many-dimensional prosthetic devices  
774 using a virtual reality environment. *J. Neurosci. Methods* **244**, 68–77 (2015).
- 775 55. Bundy, D. T., Pahwa, M., Szrama, N. & Leuthardt, E. C. Decoding three-dimensional reaching movements  
776 using electrocorticographic signals in humans. *J. Neural Eng.* **13**, 026021 (2016).
- 777 56. Oppenheim, A. V. & Schafer, R. W. *Discrete-Time Signal Processing*. (Pearson Higher Ed, 2011).
- 778 57. Bishop, C. M. *Pattern Recognition and Machine Learning*. (Springer, 2011).
- 779 58. Ghahramani, Z. & Hinton, G. E. *Parameter estimation for linear dynamical systems*. (Technical Report CRG-  
780 TR-96-2, University of Totronto, Dept. of Computer Science, 1996).
- 781 59. Benjamini, Y. & Hochberg, Y. Controlling the False Discovery Rate: A Practical and Powerful Approach to  
782 Multiple Testing. *J. R. Stat. Soc. Ser. B Methodol.* **57**, 289–300 (1995).
- 783

784

## Supplementary Figures

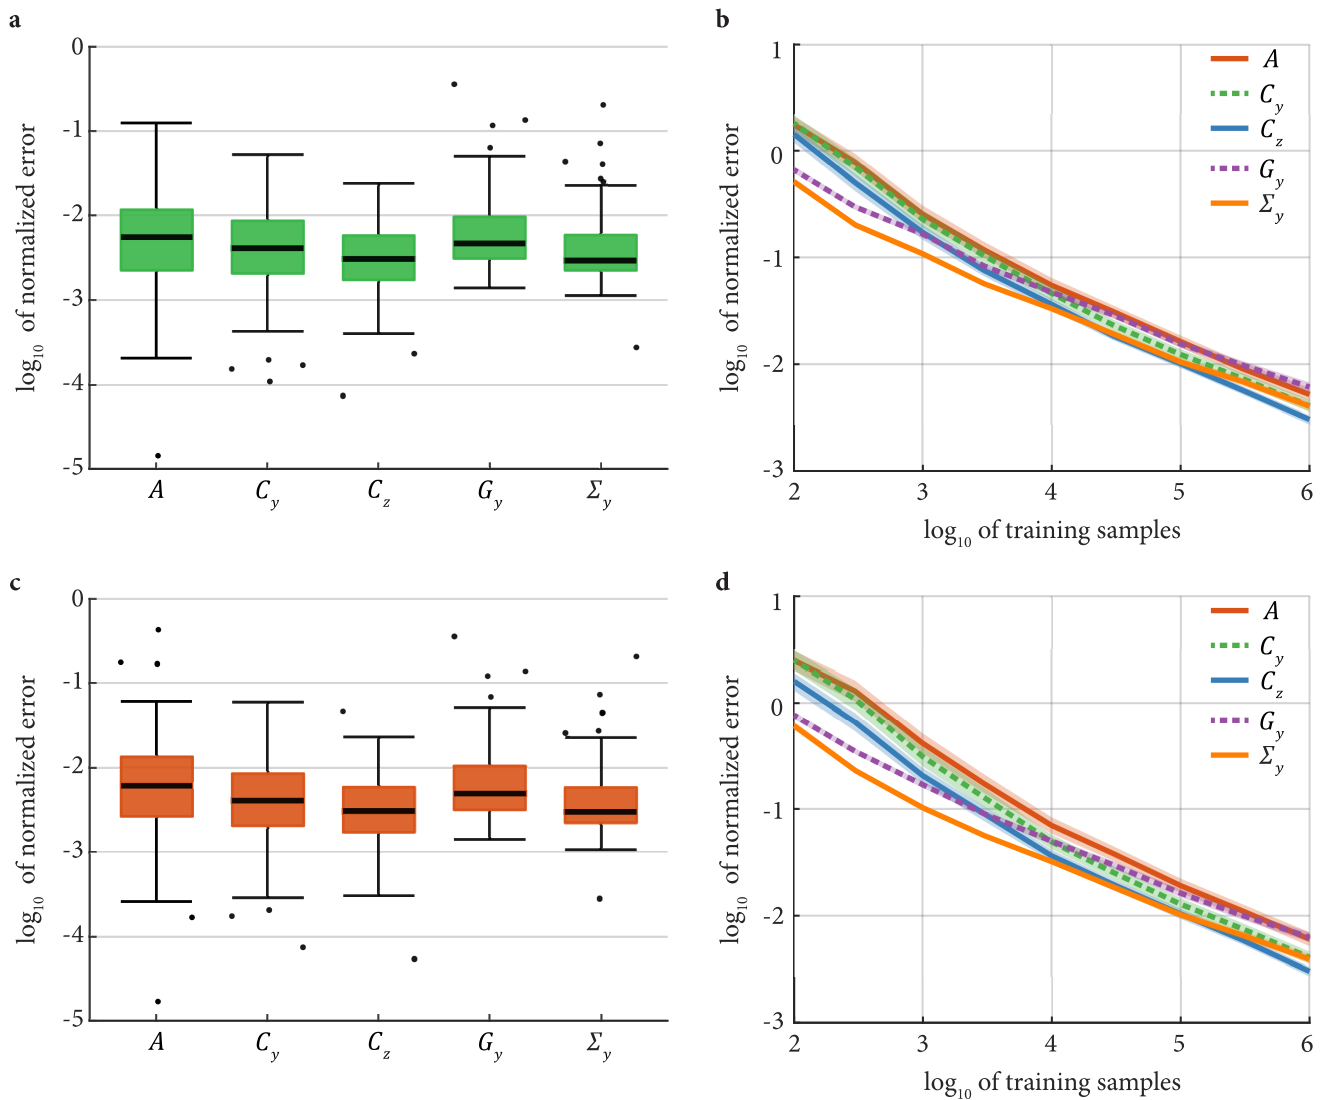

### Supplementary Figure 1. PSID correctly learns model parameters at a rate of convergence similar to that of SID while also being able to prioritize behaviorally relevant dynamics.

(a) Normalized error for identification of each model parameter using PSID (with  $10^6$  training samples) across 100 random simulated models. Each model had randomly selected state, neural activity, and behavior dimensions as well as randomly generated parameters (Methods). The parameters  $A$ ,  $C_y$ ,  $C_z$  from equation (2) together with the covariance of the neural activity  $\Sigma_y \triangleq \mathbf{E}\{y_k y_k^T\}$  and the cross-covariance of the neural activity with the latent state  $G_y \triangleq \mathbf{E}\{x_{k+1} y_k^T\}$  fully characterize the model (Methods). The horizontal dark line on the box shows the median, box edges show the 25th and 75th percentiles, whiskers represent the minimum and maximum values (other than outliers) and the dots show the outlier values. Outliers are defined as in Fig. 3. Using  $10^6$  samples, all parameters are identified with a median error smaller than 1%. (b) Normalized error for all parameters as a function of the number of training samples for PSID. The normalized error consistently decreases as more samples are used for identification. Solid line shows the average  $\log_{10}$  of the normalized error and the shaded area shows the s.e.m. (c)-(d) Same as (a)-(b), shown for the standard SID algorithm. The rate of convergence for both PSID and SID, and for all parameters is around 10 times smaller error for 100 times more training samples (i.e. slope of -0.5 on (b), (d)).

785

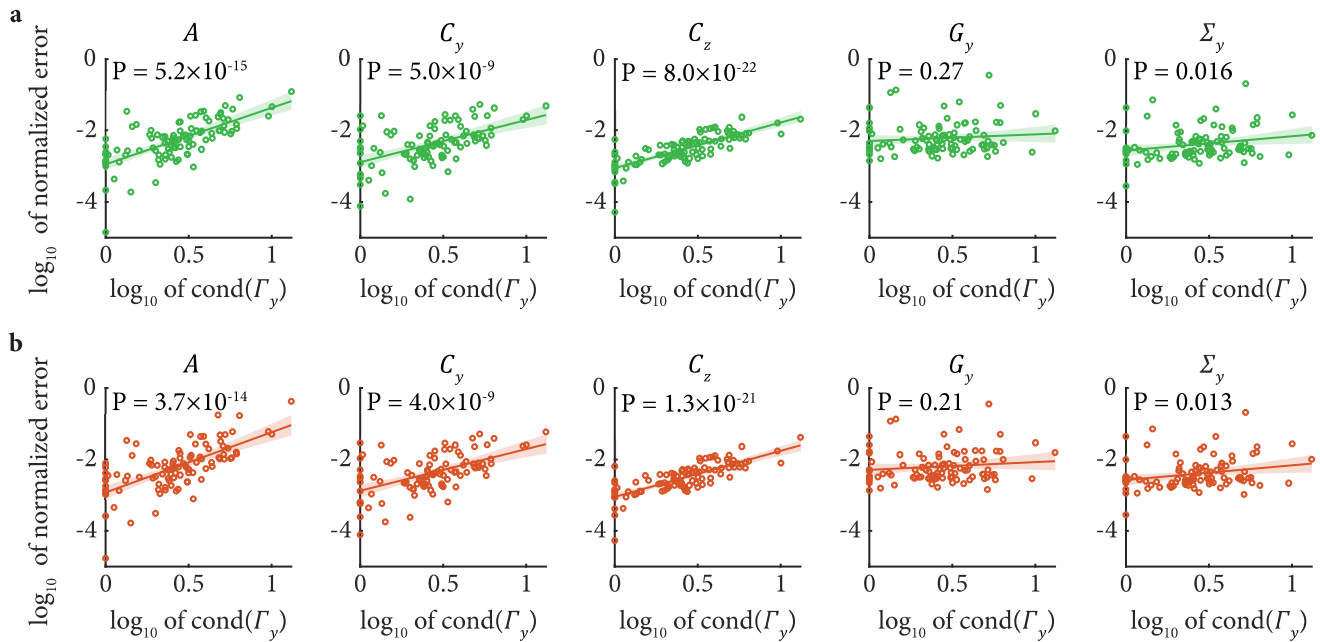

**Supplementary Figure 2. Identification error is larger for models that are closer to unobservability and thus inherently harder to identify.**

(a) Normalized error for each parameter (identified with PSID using  $10^6$  training samples) for the 100 random simulated models in Supplementary Fig. 1 is shown as a function of the condition number of the neural observability matrix  $\Gamma_y$  for the model, which is defined as the ratio of its largest to its smallest singular values (Methods). The P-value for Pearson's correlation coefficient between  $\log_{10} \text{cond}(\Gamma_y)$  and  $\log_{10}$  of normalized error is shown on each plot (number of data points is 100). The green line shows the least squares solution to fitting a line to the data points and the shaded area shows the associated 95% confidence interval. The condition number of the neural observability matrix for each model is significantly correlated with the identification error for the three model parameters (i.e.  $A$ ,  $C_y$ , and  $C_z$ ) that have the widest range of identification errors (as seen from Supplementary Fig. 1a). As a model gets closer to being unobservable and more difficult to identify, the condition number for the observability matrix increases. Thus this result indicates that the models for which these three parameters were poorly estimated were closer to being unobservable and thus were inherently more difficult to identify given the same number of training samples. (b) Same as (a) for SID, which similarly shows relatively larger error for models that are inherently less observable.

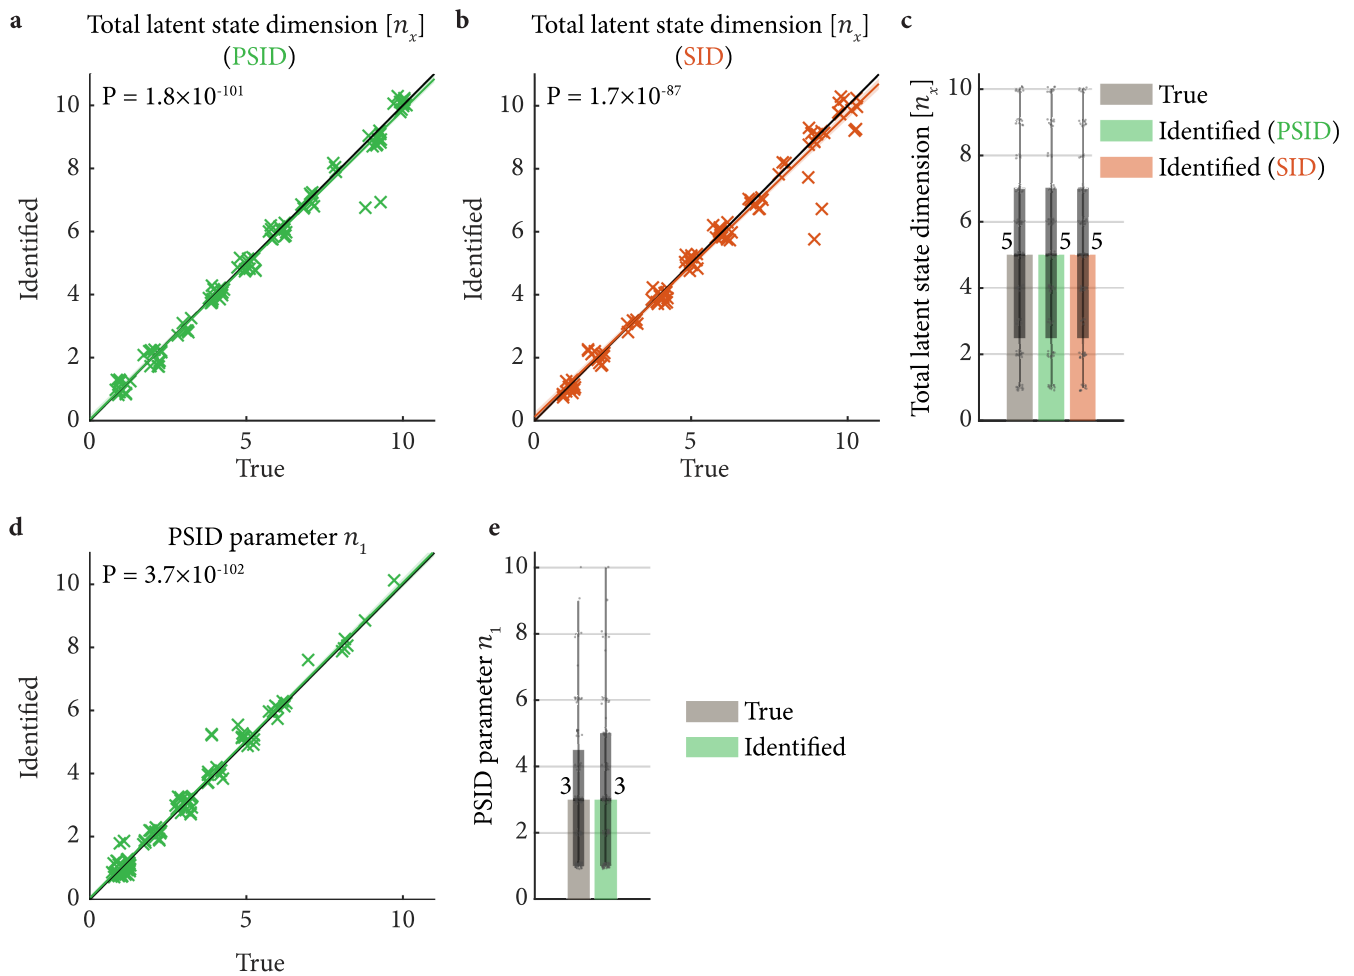

**Supplementary Figure 3. Model structure parameters can be accurately estimated using cross-validation.**

(a) Detection of the total latent state dimension ( $n_x$ ) using cross-validation is shown for numerical simulations. We estimate  $n_x$  by considering candidate values of  $n_x$  and selecting the value whose associated model reaches (within 1 s.e.m. of) the best neural *self-prediction* (predicting  $y_k$  using its past values) among all candidate values (Methods). The Pearson's correlation P-value between the true and identified values is shown on the plot. The colored line and shaded area are defined as in Supplementary Fig. 2. (b) Same as (a), for detection of  $n_x$  using cross-validation in standard SID. (c) The distribution of true and identified values of  $n_x$  from (a)-(b) is shown as a box plot. Bars and boxes are defined as in Fig. 3b. All data points are shown. (d) Same as (a), for detection of the PSID parameter  $n_1$  (Methods). (e) The distribution of true and identified values of  $n_1$  from (d) shown as a box plot. The true and identified  $n_x$  and  $n_1$  are always integer values, so for better visualization and to avoid having multiple points at the exact same location on the plots a random small displacement has been added to each point.

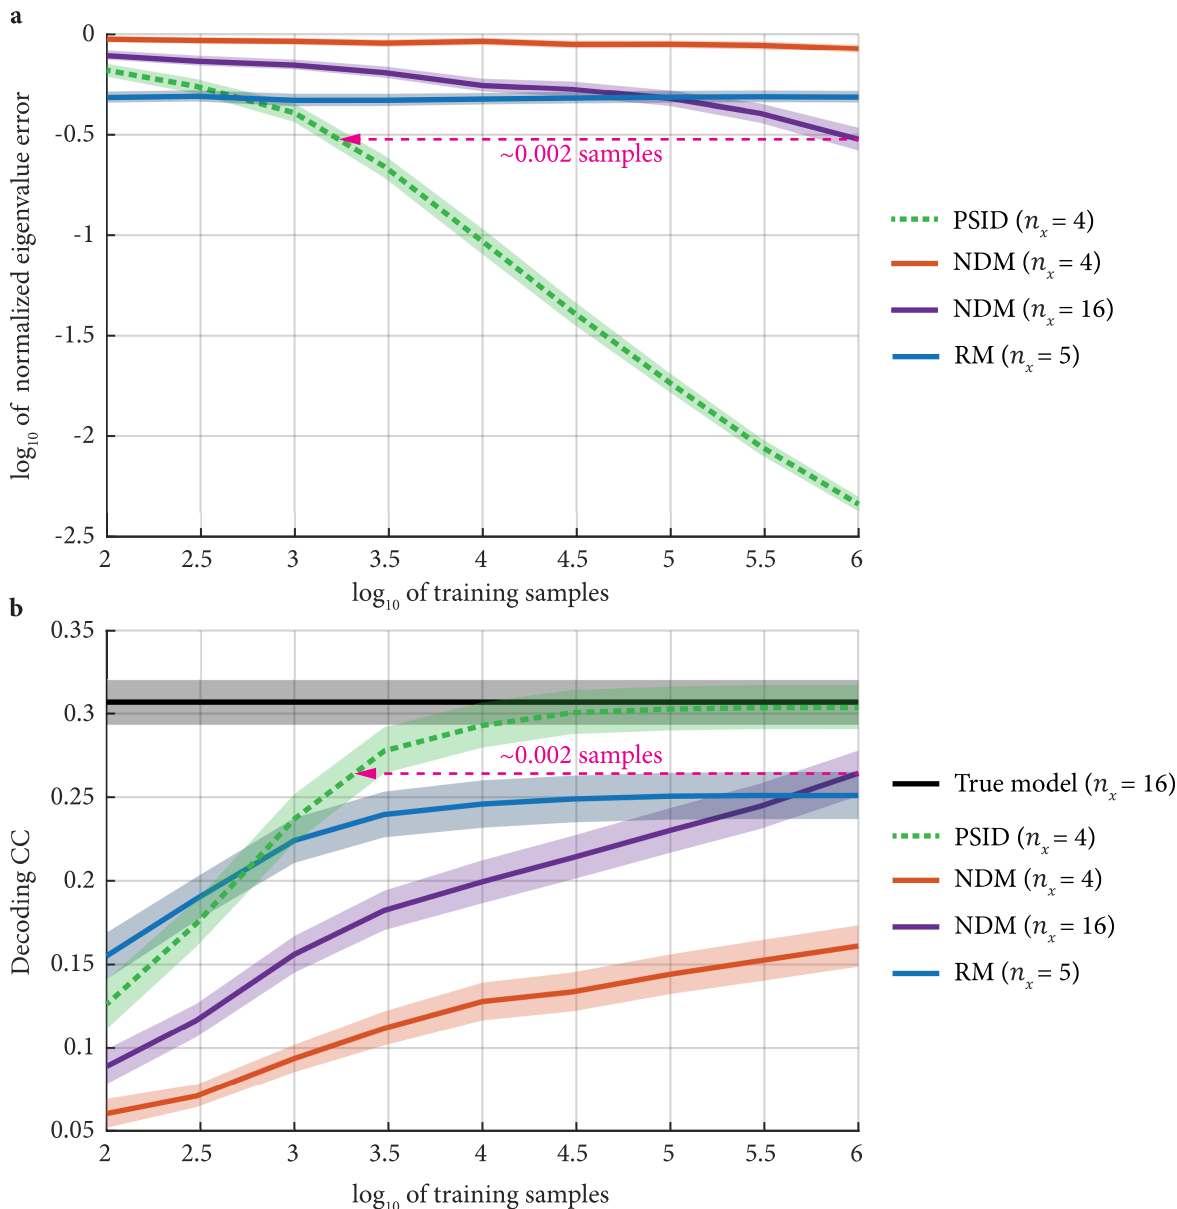

**Supplementary Figure 4. RM and NDM with the same latent state dimension as PSID cannot achieve a comparable performance to PSID even with unlimited training samples, and PSID requires orders of magnitude fewer samples to achieve the same performance as an NDM with a larger latent state dimension.**

(a) Normalized eigenvalue error is shown for 100 random simulated models when using RM, PSID, or NDM with similar or larger latent state dimension. Solid lines show the average across the 100 models, and the shaded areas show the s.e.m. For RM, the state dimension is the behavior dimension (here  $n_z = 5$ ). (b) Cross-validated behavior decoding CC for the models in (a). Optimal decoding using the true model is shown as black. For NDM with 4 latent states (i.e. in the dimension reduction regime) and RM, eigenvalue identification and decoding accuracies plateaued at some final value below that of the true model and stopped improving with further addition of training samples, indicating that the asymptotic performance of having unlimited training samples has been reached. Even for an NDM with a latent state dimension as large as the true model (i.e. not performing any dimension reduction and using  $n_x = 16$ ), (i) NDM was inferior in performance compared with PSID with a latent state dimension of only 4 when using the same number of training samples, and (ii) NDM required orders of magnitude more training samples to reach the performance of PSID with the smaller latent state dimension. Parameters are randomized as in Methods except the state noise ( $w_t$ ), which is 100 times smaller (i.e.  $-3 \leq \alpha_1 \leq -1$ ), and the behavior signal-to-noise ratio, which is 10 times smaller (i.e.  $-1 \leq \alpha_3 \leq +1$ ), both adjusted to make the decoding performances more similar to the NHP results.

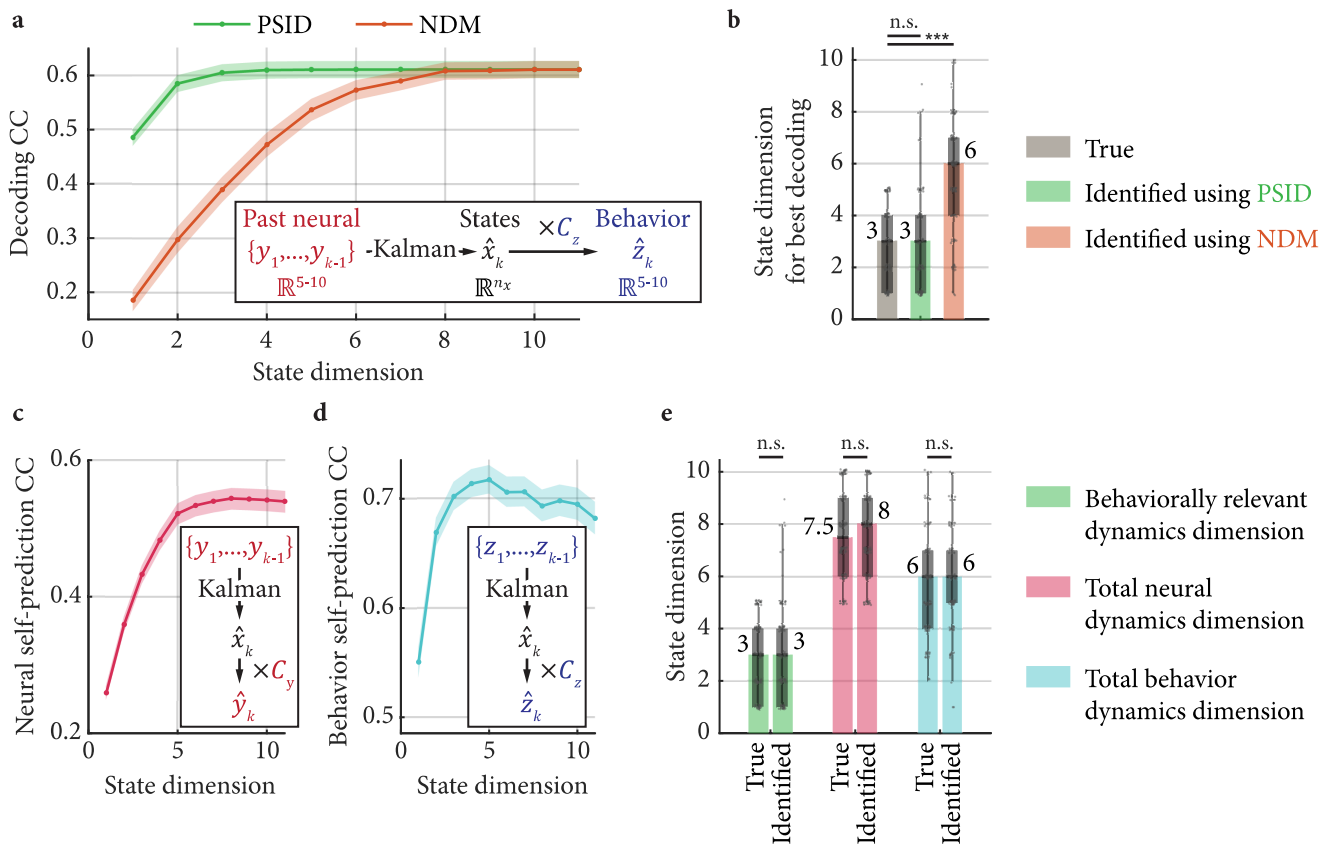

**Supplementary Figure 5. PSID can accurately estimate the behaviorally relevant dynamics dimension, as well as the total neural dynamics dimension and the total behavior dynamics dimension in simulations.**

(a) Cross-validated behavior decoding correlation coefficient (CC) as a function of latent state dimension using PSID and NDM within numerical simulations. Decoding CC is averaged across 100 random simulated models and the shaded area indicates the s.e.m. In each model, a random number of neural states were behaviorally irrelevant (Methods). (b) The behaviorally relevant neural dynamics dimension identified using PSID and NDM. This number is identified for each model as the smallest state dimension for which the CC reaches the best decoding performance. Bars, boxes and asterisks are defined as in Fig. 3b. While PSID accurately identifies the behaviorally relevant dynamics dimension, NDM overestimates it. (c) One-step-ahead self-prediction of neural activity (cross-validated CC) as a function of latent state dimension. To compute the self-prediction, SID (i.e., PSID with  $n_1 = 0$ ) is always used for modeling since dissociation of behaviorally relevant states is not needed. (d) Same as (c) for one-step-ahead self-prediction of behavior. (e) True and identified values for behaviorally relevant neural dynamics dimension (PSID results from (b)), the total neural dynamics dimension (identified as the state dimension for best neural self-prediction from (c)) and the total behavior dynamics dimension (identified as the state dimension for best behavior self-prediction from (d)). These results confirm with numerical simulations that our approach for identifying the total neural and behavior dynamics dimensions correctly estimates these numbers, and that PSID accurately identifies the behaviorally relevant dynamics dimension from data. Consequently, the same cross-validation approach is used in Fig. 3 for the real NHP data to compute the dimensions.



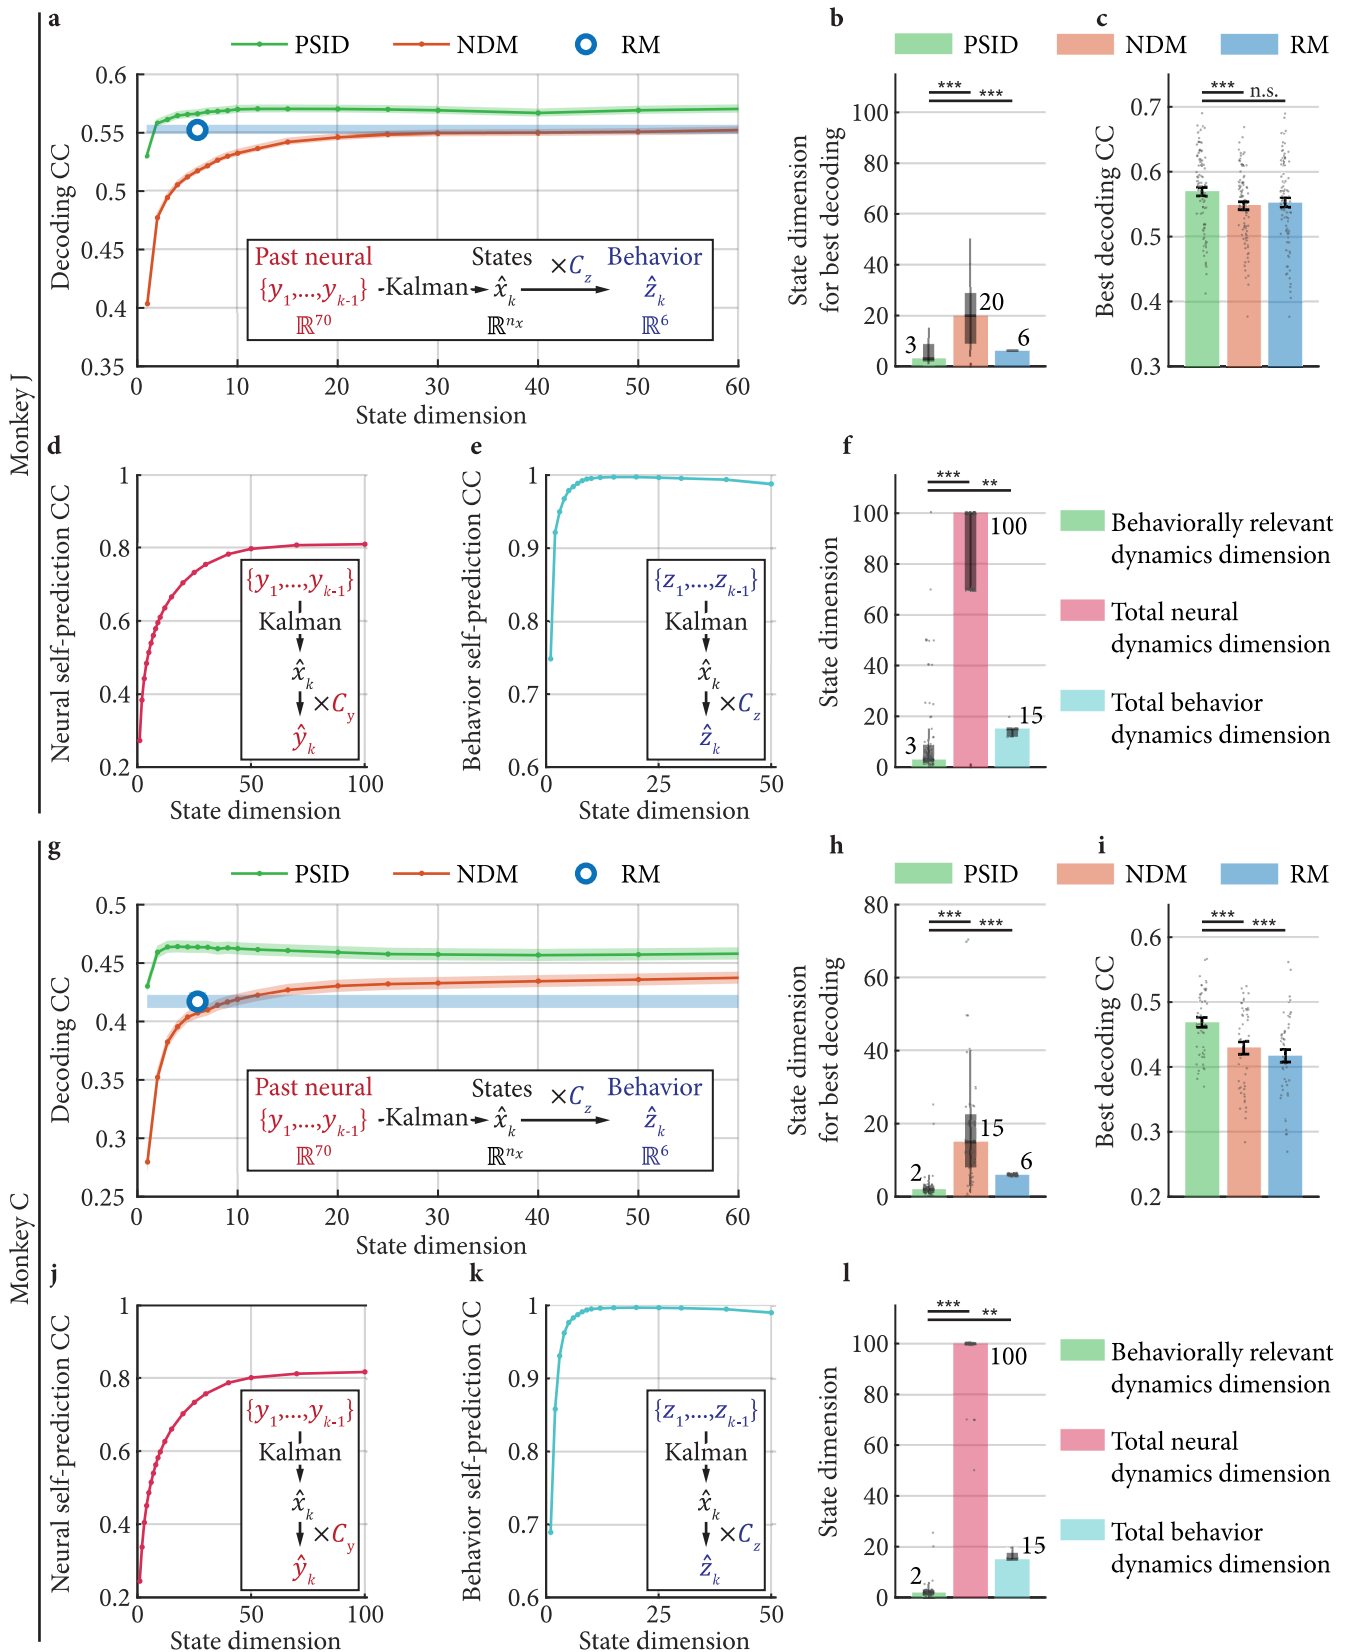

**Supplementary Figure 6. PSID again reveals a markedly lower dimension for behaviorally relevant neural dynamics in the motor cortex when behavior is taken as the 3D end-point position (of hand and elbow) instead of the joint angles. Notation is the same as in Fig. 3, but this time for behavior taken as the 3D position of hand and elbow ( $n_z = 6$ ).**

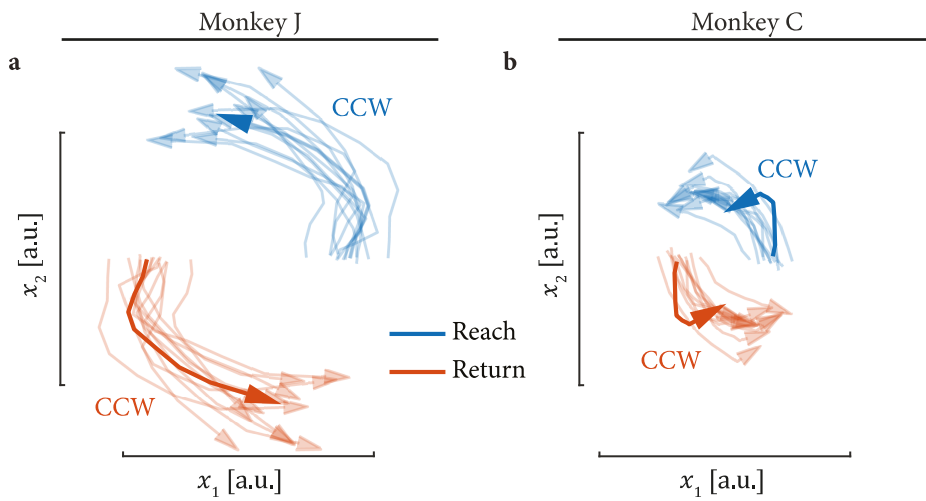

**Supplementary Figure 7. Similar to NDM, jPCA extracts rotations that are in the same direction during reach and return epochs.**

Notation is the same as in Fig. 4 for projections to 2D space extracted using jPCA.

791

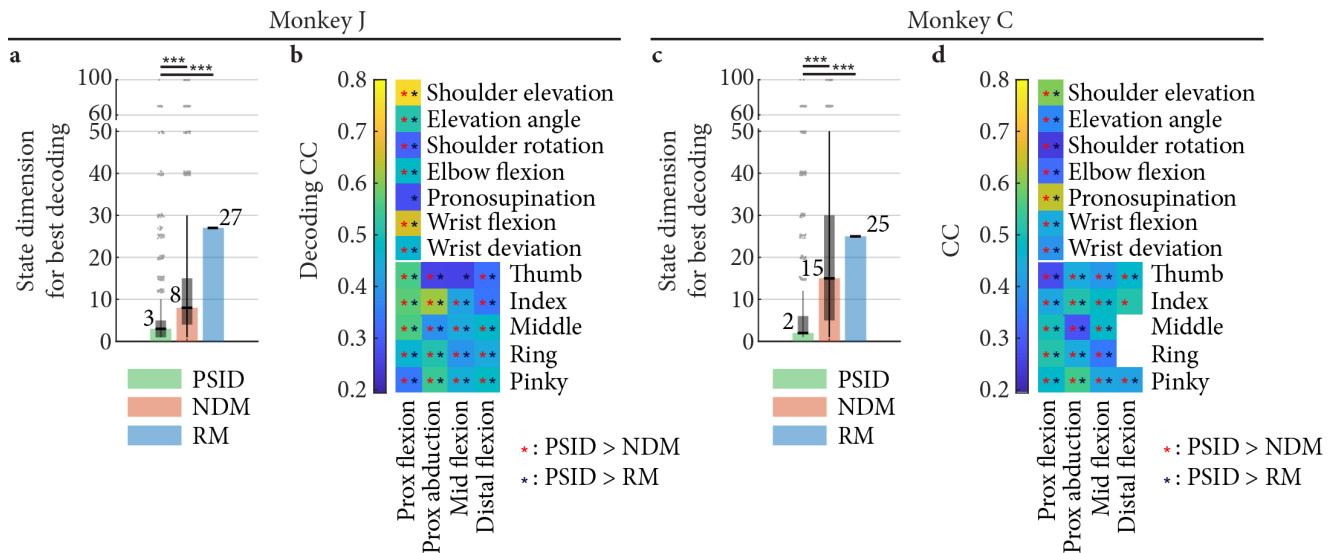

**Supplementary Figure 8. The PSID-extracted latent states with markedly lower dimension achieve significantly better decoding of almost all arm and finger joints.**

(a) The state dimension used by each method to achieve the best decoding for individual joints. For all methods, models are fitted to all joints as in Fig. 3. For PSID and NDM, models are fitted using various state dimensions; then for each joint, the latent state dimension is chosen to be the smallest value for which the decoding CC reaches within 1 s.e.m. of the best decoding CC possible for that joint among all latent state dimensions. Bars, boxes and asterisks are defined as in Fig. 3b. For better visualization of outliers, the vertical axis is broken. (b) Cross-validated correlation coefficient (CC) between the decoded and true joint angles is shown for PSID. Asterisks mark joints for which PSID results in significantly ( $P < 0.05$ ) better decoding compared with NDM (red asterisk) or RM (dark blue asterisk). The latent state for each method is chosen as in (a). (c)-(d) Same as (a)-(b), for monkey C.

793

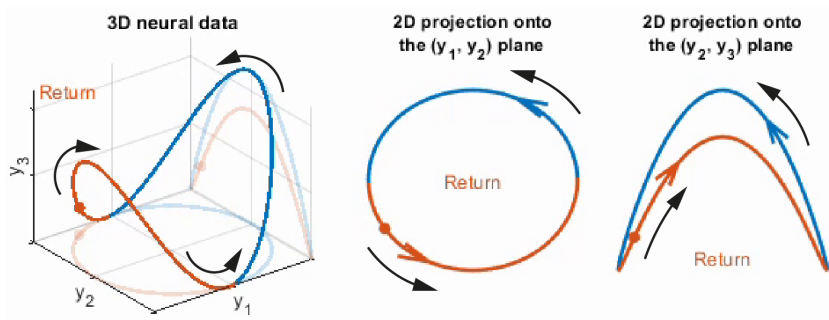

**Supplementary Video 1. Visualization of how high-dimensional neural dynamics may contain 2D rotations both in the same and in opposite directions.**

The presented simulation depicts a hypothetical scenario where 3 dimensions of neural activity traverse a manifold in 3D space of which different projections reveal rotations in the same or opposite directions during reach vs return epochs. Among all projections, PSID can find the projection corresponding to the behaviorally relevant neural dynamics (e.g. here the  $(y_2 - y_3)$  plane, if behavior is best predicted using the activity in this plane) whereas the standard behavior-agnostic NDM methods may find other projections (e.g. the  $(y_1 - y_2)$  plane).

794

## 795 **Supplementary Notes**

### 796 **Supplementary Note 1: The distinction between primary and secondary signals**

797 To clarify the difference between the signals  $y_k$  and  $z_k$  in equation (2), it is worth noting that in the formulation  
798 of equation (2),  $y_k$  is taken as the primary signal in the sense that the latent state  $x_k$  describes the complete  
799 dynamics of  $y_k$  that also includes its shared dynamics with the secondary signal  $z_k$ . The designation of the  
800 primary and secondary signals (e.g. taking  $y_k$  to be the neural activity and  $z_k$  to be the behavior or vice versa) is  
801 interchangeable as far as the shared dynamics of the two signals are of interest and the choice of the primary signal  
802 only determines which signal's dynamics are fully described beyond the shared dynamics. In this work we take the  
803 primary signal  $y_k$  to be the neural activity and the secondary signal  $z_k$  to be the behavior. This is motivated by the  
804 typical scenario in neuroscience and neuroengineering where the neural activity is often considered the primary  
805 signal and the goal is to learn how behavior is encoded in it or to decode behavior from it.

806 The term  $C_z x_k^S$  in equation (2), which we refer to as

$$z_{1k} = C_z x_k^S, \quad (36)$$

807 represents the part of the secondary signal  $z_k$  that is contributed by  $x_k^S$  and thus shared with the primary signal.  
808 Any additional dynamics of the secondary signal that are not shared with the primary signal are modeled as the  
809 general independent signal  $\epsilon_k$ . If modeling these dynamics of the secondary signal is also of interest, after learning  
810 the parameters of equation (2), one could use the model to estimate  $z_{1k}$  (Supplementary Note 4) and thus  $\epsilon_k$  (as  
811  $\epsilon_k = z_k - z_{1k}$ ) in the training data and then use standard dynamic modeling techniques (e.g. SID) to characterize  
812 the dynamics of  $\epsilon_k$  in terms of another latent state-space model. But since these dynamics are independent of  $y_k$ ,  
813 such characterization would not be helpful in describing the encoding of  $z_k$  in  $y_k$  or in decoding of  $z_k$  from  $y_k$   
814 and thus we will not discuss their identification, and only discuss their generation in our numerical simulations  
815 (Supplementary Note 7).

## 816 **Supplementary Note 2: Equivalent sets of parameters that can fully describe the model**

817 We define  $G_y \triangleq E\{x_{k+1}^s y_k^T\}$  specifying the cross-covariance of  $y_k$  with the state at the next time step,  $\Sigma_x \triangleq$   
818  $E\{x_k^s x_k^{sT}\}$  specifying the covariance of  $x_k^s$  and  $\Sigma_y \triangleq E\{y_k y_k^T\}$  specifying the covariance of  $y_k$ . From equation (2),  
819 it is straight forward to show that these covariances are related to the model noise statistics (equation (3)) via

$$\Sigma_x = A \Sigma_x A^T + Q \quad (37)$$

$$\Sigma_y = C_y \Sigma_x C_y^T + R \quad (38)$$

$$G_y = A \Sigma_x C_y^T + S \quad (39)$$

820 where equation (37) is also known as the Lyapunov equation<sup>33,51</sup>. The Lyapunov equation (37) has a unique  
821 solution for  $\Sigma_x$  if  $A$  is stable (i.e. the absolute value of all its eigenvalues are less than 1)<sup>51</sup>. For stable systems  
822 (models with a stable  $A$ ), it is clear from equations (37)-(39) that there is a one to one relation between the set of  
823 parameters  $(A, C_y, C_z, G_y, \Sigma_y, \Sigma_x)$  and the set  $(A, C_y, C_z, Q, R, S)$ , and thus both sets can be used to describe the  
824 model in equation (2).

825 Equation (2) is known as the forward stochastic formulation for a linear state-space model. Given that only  $y_k$   
826 and  $z_k$  are measurable real quantities and that the stochastic latent state  $x_k^s$  is not directly accessible, equation (2)  
827 is called an *internal* description for the signals  $y_k$  and  $z_k$ <sup>51</sup>. This internal description is not unique and a family of  
828 infinitely many models with different  $x_k^s$  can describe the same  $y_k$  and  $z_k$ . For example, any non-singular matrix  
829  $T'$  can transform equation (2) to an equivalent model with  $x_{k_{new}}^s = T' x_k^s$ , a process known as a similarity  
830 transform (or a change of basis). Moreover, Faurre's stochastic realization problem shows that even beyond  
831 similarity transforms, there are non-unique sets of noise statistics ( $Q, R$ , and  $S$ ) that give the exact same second  
832 order statistics for  $y_k$ <sup>33,51</sup>. The unique and complete *external* description for  $y_k$  and  $z_k$  consists of their second  
833 order statistics. Thus, in the model learning problem, all models that give the correct external description are  
834 equally valid solutions. The set of parameters  $(A, C_y, C_z, G_y, \Sigma_y, \Sigma_x)$  are thus more suitable (compared with the  
835 equivalent set of parameters  $(A, C_y, C_z, Q, R, S)$ ) for evaluating model learning because among this set, all

836 parameters other than  $\Sigma_x$  are uniquely determined from second order statistics of  $y_k$  and  $z_k$ , up to within a  
837 similarity transform<sup>33,51</sup>.

### 838 **Supplementary Note 3: Equivalent model formulation with behaviorally relevant states separated** 839 **from the other states giving rise to equation (4)**

840 Given the second order statistics of  $y_k$  (its auto-covariances at all possible time differences, see equation (51)),  
841 any set of parameters for equation (2) that would describe how the same second order statistics could be generated  
842 from a latent state  $x_k^S$  is known as a realization for  $y_k$ <sup>51</sup>. We can rewrite equation (2) in an equivalent realization in  
843 which the behaviorally relevant states are clearly separated from the others. To do this, without loss of generality,  
844 we first assume that equation (2) is written as a minimal realization of  $y_k$ , defined as a realization with the smallest  
845 possible state dimension  $n_x$ <sup>51</sup>. For such a minimal realization, it can be shown that the pair  $(A, C_y)$  is observable  
846 and the pair  $(A, G_y)$  is reachable (Theorem 3.12 from ref. 51). Equivalently, both the neural observability matrix

$$\Gamma_y = \begin{bmatrix} C_y \\ C_y A \\ \vdots \\ C_y A^{n_x-1} \end{bmatrix} \quad (40)$$

847 and the neural reachability matrix

$$\Delta_y = [G_y \quad AG_y \quad \dots \quad A^{n_x-1}G_y] \quad (41)$$

848 are full rank with rank of  $n_x$  (Theorems 3.4 and 3.7 from ref. 51).

849 Since not all latent states that contribute to the neural activity are expected to also contribute to a specific  
850 behavior of interest (equations (2) and (36)), the pair  $(A, C_z)$  is not necessarily observable (i.e. it may not be  
851 possible to uniquely infer the full latent state  $x_k^S$  only from behavioral observations  $z_k$ ). In other words, the  
852 behavior observability matrix

$$\Gamma_z = \begin{bmatrix} C_z \\ C_z A \\ \vdots \\ C_z A^{n_x-1} \end{bmatrix} \quad (42)$$

853 may not be full rank. We define  $n_1 = \text{rank}(\Gamma_z)$  as the number of latent states that drive behavior because as we  
 854 show next, the latent state  $x_k^s$  can be separated into two parts in a way that only  $n_1$  dimensions contribute to the  
 855 behavior  $z_k$ . We can show, by applying Theorem 3.6 from ref. 51 to the first and third rows of equation (2), that if  
 856  $n_1 < n_x$ , there exists a nonsingular matrix  $T'$  that via the similarity transform

$$\begin{bmatrix} x_k^{(1)} \\ x_k^{(2)} \end{bmatrix} = x_k = T' x_k^s \quad (43)$$

857 gives equation (4) as an equivalent formulation for equation (2).

#### 858 **Supplementary Note 4: Kalman filtering and the equivalent forward innovation formulation**

859 Given the linear state-space formulation of equation (2), it can be shown that the best prediction of  $y_{k+1}$  using  
 860  $y_1$  to  $y_k$  (denoted as  $\hat{y}_{k+1|k}$ ) in the sense of having the minimum mean-square error, and similarly the best  
 861 prediction of  $z_{k+1}$  using  $y_1$  to  $y_k$  (denoted as  $\hat{z}_{k+1|k}$ ) are obtained with the well-known recursive Kalman filter<sup>51</sup>,  
 862 which can be written as

$$\begin{cases} \hat{x}_{k+1|k} = A \hat{x}_{k|k-1} + K_k (y_k - C \hat{x}_{k|k-1}) \\ \hat{y}_{k+1|k} = C_y \hat{x}_{k+1|k} \\ \hat{z}_{k+1|k} = C_z \hat{x}_{k+1|k} \end{cases} \quad (44)$$

863 where the recursion is initialized with  $\hat{x}_{0|-1} = 0$  and  $K_k$  is the Kalman gain<sup>51</sup> equal to

$$K_k = (A \tilde{P}_{k|k-1} C_y^T + S) (C_y \tilde{P}_{k|k-1} C_y^T + R)^{-1}. \quad (45)$$

864 Here  $\tilde{P}_{k|k-1}$  is the covariance of the error for one-step-ahead prediction of the state (i.e. covariance of  $\tilde{x}_{k|k-1} =$   
 865  $\hat{x}_{k|k-1} - x_k$ ) and can be computed via the recursive Riccati equation

$$\tilde{P}_{k+1|k} = A \tilde{P}_{k|k-1} A^T + Q - (A \tilde{P}_{k|k-1} C_y^T + S) (C_y \tilde{P}_{k|k-1} C_y^T + R)^{-1} (A \tilde{P}_{k|k-1} C_y^T + S)^T \quad (46)$$



866 with the recursion initialized with  $P_{0|-1} = R_y$ . The steady-state solution of Riccati equation can be obtained by  
 867 replacing  $\tilde{P}_{k+1|k}$  with  $\tilde{P}_{k|k-1}$  in the equation and solving for  $\tilde{P}_{k|k-1}$ . We will drop the subscript and denote the  
 868 steady-state solution of equation (46) as  $\tilde{P}$  and the associated steady-state Kalman gain as  $K$ , which is obtained by  
 869 substituting  $\tilde{P}$  in equation (45).

870 Writing the outputs in terms of the Kalman filter states gives an alternative formulation for equation (2), which  
 871 is known as the forward innovation formulation and is more convenient for deriving PSID. In particular, this  
 872 formulation shows that the optimal estimate of the latent state is a linear function of the past neural activity. Based  
 873 on this idea and the fact mentioned earlier that the best prediction of behavior and neural activity using past  
 874 neural activity is a linear function of the latent state (equation (44)), we can show that linear projections of  
 875 behavior and neural activity onto the past neural activity can be used to directly estimate the latent states from the  
 876 data first, and then use the estimated latent states to learn the model parameters (Supplementary Note 5). The  
 877 forward innovation formulation given by

$$\begin{cases} x_{k+1} = A x_k + K e_k \\ y_k = C_y x_k + e_k \\ z_k = C_z x_k + \varepsilon_k \end{cases} \quad (47)$$

878 Here  $x_k \triangleq \hat{x}_{k|k-1}$ ,  $K$  is the steady-state Kalman gain and  $e_k$  is the innovation process, which is the part of  $y_k$  that  
 879 is not predictable from its past values<sup>33,51</sup>. Equations (2) and (47) have different state and noise time-series but are  
 880 equivalent alternative internal descriptions for the same  $y_k$  and  $z_k$  (Supplementary Note 2). The forward  
 881 innovation formulation in equation (47) is more convenient (compared with the forward stochastic formulation  
 882 in equation (2)) for the derivation of PSID. Specifically, by recursively substituting the previous iteration of  
 883 equation (47) into its current iteration, it can be shown that

$$\hat{x}_{k|k-1} = \Delta_{y_k}^c \Lambda_{y_k}^{-1} \begin{bmatrix} y_0 \\ \vdots \\ y_{k-1} \end{bmatrix} \quad (48)$$

884 where

$$\Delta_{y_k}^c = [A^{k-1}G_y \quad A^{k-2}G_y \quad \cdots \quad AG_y \quad G_y] \quad (49)$$

885 and

$$\Lambda_{y_k} \triangleq \begin{bmatrix} \Sigma_{y_0} & \Sigma_{y_{-1}} & \cdots & \Sigma_{y_{1-k}} \\ \Sigma_{y_1} & \Sigma_{y_0} & \cdots & \Sigma_{y_{2-k}} \\ \vdots & \vdots & \ddots & \vdots \\ \Sigma_{y_{k-1}} & \Sigma_{y_{k-2}} & \cdots & \Sigma_{y_0} \end{bmatrix} \quad (50)$$

886 with the notation  $\Sigma_{y_d} \triangleq \mathbf{E}\{y_{k+d}y_k^T\}$  (Theorem 6 from ref. 33). This formulation reveals a key observation that  
 887 enables identification of model parameters via a direct estimation of the latent state: the latent state in equation  
 888 (47) (which is an equivalent formulation for equation (2)), is a linear function of the past  $y_k$ . Moreover, from  
 889 equation (2), it can be shown that for  $d \geq 1$

$$\Sigma_{y_d} \triangleq \mathbf{E}\{y_{k+d}y_k^T\} = C_y A^{d-1} G_y, \quad \Sigma_{y_{-d}} = (C_y A^{d-1} G_y)^T \quad (51)$$

890 indicating that  $\Lambda_{y_k}$  in equation (50) and thus the linear prediction function  $\Delta_{y_k}^c \Lambda_{y_k}^{-1}$  in (48) only depend on  $\Sigma_y$ ,  $A$ ,  
 891  $C_y$  and  $G_y$ <sup>33,51</sup>. Thus, from equations (44) and (48) it is clear that the only parameters that are needed for optimal  
 892 prediction of  $y_k$  and  $z_k$  using past  $y_k$  are  $A$ ,  $C_y$ ,  $C_z$ ,  $G_y$  and  $\Sigma_y$ , which are all parameters that are uniquely  
 893 identifiable within a similarity transform<sup>33,51</sup> (Supplementary Note 2). As we confirm with numerical simulations,  
 894 all these parameters can be accurately estimated using PSID (Supplementary Fig. 1).

## 895 **Supplementary Note 5: Derivations of PSID**

### 896 ***PSID, stage 1: Extracting behaviorally relevant latent states***

897 The central idea in PSID is that based on equations (44) and (48), the part of  $z_k$  that is predictable from past  $y_k$   
 898 is a linear combination of the past  $y_k$  and thus must lie in a subspace of the space spanned by the past  $y_k$ . We use  
 899 an orthogonal projection from future  $z_k$  onto past  $y_k$  to extract the part of  $z_k$  that is predictable from past  $y_k$ ,  
 900 which leads to the direct extraction of the behaviorally relevant latent states from the neural and behavior data  $y_k$   
 901 and  $z_k$ , even before the model parameters are known. Given the extracted latent states, the model parameters can  
 902 then be estimated using least squares based on equation (4).

903 In the first stage of PSID, the part of  $z_k$  that is predictable from past  $y_k$  is extracted from the training data by  
 904 projecting the future  $z_k$  values onto their corresponding past  $y_k$  values. To find the projection, for each time  $k$ , we  
 905 consider the corresponding ‘past’ and ‘future’ to be the previous  $i$  samples and the next  $i - 1$  samples respectively,  
 906 with  $i$  being a user specified parameter termed the projection horizon. For each sample  $y_k$  with  $i \leq k \leq N - i$ , the  
 907 previous (past)  $i$  samples (from  $y_{k-i}$  to  $y_{k-1}$ ) are all stacked together as the  $(k - i + 1)$ th column of one large  
 908 matrix  $Y_p \in \mathbb{R}^{in_y \times j}$  (with  $j = N - 2i + 1$ ); correspondingly, for each sample  $y_k$  with  $i \leq k \leq N - i$ , that sample  
 909 together with the next (future)  $i - 1$  samples (from  $y_k$ , to  $y_{k+i-1}$ ) are all stacked together as the  $(k - i + 1)$ th  
 910 column of one large matrix  $Y_f \in \mathbb{R}^{in_y \times j}$  (equation (5)). Analogously, we form matrices  $Z_p \in \mathbb{R}^{in_z \times j}$  and  $Z_f \in$   
 911  $\mathbb{R}^{in_z \times j}$  from  $z_k$  (equation (6)). Thus,  $Z_f$  and  $Y_p$  have the same number of columns with each column of  $Z_f$   
 912 containing some consecutive samples of behavior while the corresponding column in  $Y_p$  contains the previous  $i$   
 913 samples from neural activity. The goal is to find the part of  $Z_f$  that is linearly predictable from corresponding  
 914 columns of  $Y_p$  (i.e. the behavior in each column of  $Z_f$  from its past neural activity). The linear least squares  
 915 solution for this prediction problem has the closed form solution given in equation (7)<sup>33,51</sup>, which is in the form of  
 916 a projection from future behavior onto past neural activity. We show below that this projection can be  
 917 decomposed into the multiplication of an observability matrix for behavior and a running estimate of the Kalman  
 918 estimated latent states, which will then enable the estimation of model parameters using the estimated latent  
 919 states.

920 First, note that the least squares solution of equation (7) can also be written as

$$\hat{Z}_f = Z_f Y_p^T (Y_p Y_p^T)^{-1} Y_p = \Sigma_{z_f y_p} \Sigma_{y_p y_p}^{-1} Y_p \quad (52)$$

921 where  $\Sigma_{z_f y_p} \triangleq \frac{1}{j} Z_f Y_p^T$  and  $\Sigma_{y_p y_p} \triangleq \frac{1}{j} Y_p Y_p^T$  are sample covariance matrices for the covariance of past neural  
 922 activity with future behavior and past neural activity, respectively, computed using their observed time-samples  
 923 from equations (5) and (6). Sample covariance estimates are asymptotically unbiased and thus for  $j \rightarrow \infty$  they  
 924 would converge to their true value in the model<sup>33,51</sup>. Consequently, for the model in equation (2), it can be shown

925 (by replacing samples covariances with exact covariances from the model) that for  $j \rightarrow \infty$ ,  $\Sigma_{y_p y_p}$  converges to  $\Lambda_{y_i}$   
 926 defined per equation (50) and  $\Sigma_{z_f y_p}$  converges to

$$\Lambda_{z y_i} \triangleq \begin{bmatrix} \Sigma_{z y_i} & \Sigma_{z y_{i-1}} & \cdots & \Sigma_{z y_1} \\ \Sigma_{z y_{i+1}} & \Sigma_{z y_i} & \cdots & \Sigma_{z y_2} \\ \vdots & \vdots & \ddots & \vdots \\ \Sigma_{z y_{2i-1}} & \Sigma_{z y_{2i-2}} & \cdots & \Sigma_{z y_i} \end{bmatrix} \quad (53)$$

927 where we are using the notation  $\Sigma_{z y_d} \triangleq \mathbf{E}\{z_{k+d} y_k^T\}$ . From equation (2) it can be shown that

$$\Sigma_{z y_d} \triangleq \mathbf{E}\{z_{k+d} y_k^T\} = C_z A^{d-1} G_y, \quad \Sigma_{z y_{-d}} = (C_z A^{d-1} G_y)^T \quad (54)$$

928 which has a form similar to equation (51). Substituting into the definition of  $\Lambda_{z y_i}$  from equation (53) gives

$$\Lambda_{z y_i} \triangleq \begin{bmatrix} \Sigma_{z y_i} & \Sigma_{z y_{i-1}} & \cdots & \Sigma_{z y_1} \\ \Sigma_{z y_{i+1}} & \Sigma_{z y_i} & \cdots & \Sigma_{z y_2} \\ \vdots & \vdots & \ddots & \vdots \\ \Sigma_{z y_{2i-1}} & \Sigma_{z y_{2i-2}} & \cdots & \Sigma_{z y_i} \end{bmatrix} = \begin{bmatrix} C_z \\ C_z A \\ \vdots \\ C_z A^{i-1} \end{bmatrix} [A^{i-1} G_y \quad A^{i-2} G_y \quad \cdots \quad A G_y \quad G_y] \triangleq \Gamma_{z_i} \Delta_{y_i}^c \quad (55)$$

929 where  $\Gamma_{z_i}$  is termed the extended observability matrix for the pair  $(A, C_z)$  and  $\Delta_{y_i}^c$  is termed the reversed extended  
 930 controllability matrix for the pair  $(A, G_y)$ <sup>33</sup>. Moreover, based on equation (48), the Kalman filter prediction at time  
 931  $k$  using only the last  $i$  observations ( $y_{k-i}$  to  $y_{k-1}$ ) can be written in terms of  $\Delta_{y_i}^c$  (equation (55)) as

$$\hat{x}_{k|k-1} = \Delta_{y_i}^c \Lambda_{y_i}^{-1} \begin{bmatrix} y_{k-i} \\ \vdots \\ y_{k-1} \end{bmatrix}. \quad (56)$$

932 Thus, for  $j \rightarrow \infty$ , equation (52) can be written as

$$\hat{Z}_f = Z_f Y_p^T (Y_p Y_p^T)^{-1} Y_p = \Sigma_{z_f y_p} \Sigma_{y_p y_p}^{-1} Y_p = \Lambda_{z y_i} \Lambda_{y_i}^{-1} Y_p = \Gamma_{z_i} \Delta_{y_i}^c \Lambda_{y_i}^{-1} Y_p = \Gamma_{z_i} \hat{X}_i \quad (57)$$

933 where columns of  $\hat{X}_i$  are Kalman estimates obtained using the past  $i$  observations of  $y_k$  (from equation (56)).

934 Before we use equation (57) to conclude the derivation of the first stage of PSID, it is useful for the derivation of

935 the second stage to note that if we repeat the above steps for the projection of  $Y_f$  onto  $Y_p$ , we will get

$$\hat{Y}_f = Y_f Y_p^T (Y_p Y_p^T)^{-1} Y_p = \Sigma_{y_f y_p} \Sigma_{y_p y_p}^{-1} Y_p = \Gamma_{y_i} \Delta_{y_i}^c \Lambda_{y_i}^{-1} Y_p = \Gamma_{y_i} \hat{X}_i \quad (58)$$

936 where  $\Gamma_{y_i}$  is the extended observability matrix for the pair  $(A, C_y)$  and  $\hat{X}_i$  are *the exact same* Kalman states as in  
937 equation (57).

938 Equation (57) shows how  $\hat{Z}_f$ , which is the projection of future behavior onto past neural activity and is directly  
939 computable from data, can be decomposed into the extended behavior observability matrix  $\Gamma_{z_i}$  and the Kalman  
940 states  $\hat{X}_i$ . This decomposition allows us to estimate the latent states even before the model parameters are learned  
941 and paves the way for subsequent learning of the model parameters. The decomposition can be performed by  
942 taking singular value decomposition (SVD) from equation (57) (shown in equation (9)), which gives:

$$\Gamma_{z_i} = US^{\frac{1}{2}}, \quad \hat{X}_i = S^{\frac{1}{2}}V^T \quad (59)$$

943 Note that the above is only one of many valid decompositions since multiplying any non-singular matrix  $T$  onto  
944  $\Gamma_{z_i}$  from the right and its inverse  $T^{-1}$  onto  $\hat{X}_i$  from the left amounts to a similarity transform and gives an  
945 equivalent model with a different basis<sup>33</sup>. Without loss of generality, we assume that the latent states are not trivial  
946 linear combinations of each other and thus  $\hat{X}_i$  is full rank. Given that only  $n_1$  states drive behavior  
947 (Supplementary Note 3),  $\hat{X}_i$  as well as  $\Gamma_{z_i}$  will have rank of  $n_1$ . Indeed,  $n_1$  was defined as the rank of the behavior  
948 observability matrix  $\Gamma_z$  and for a sufficiently large horizon  $i$  (i.e.  $i \geq n_1$  is sufficient but not necessary), the rank of  
949 the extended behavior observability matrix  $\Gamma_{z_i}$  will also be  $n_1$ <sup>51</sup>. For  $j \rightarrow \infty$ , as shown earlier, equation (57) holds  
950 exactly and thus the row rank of  $\hat{Z}_f$  and the number of its non-zero singular values will be equal to the rank of  $\hat{X}_i$   
951 and  $\Gamma_{z_i}$ , which is  $n_1$  (Supplementary Note 3). For finite data ( $j < \infty$ ), it is expected that an approximation of this  
952 relation will hold and thus one could find  $n_1$  via inspection of the singular values of  $\hat{Z}_f$ . In Methods, we instead  
953 proposed a more general method of using cross validation to find both  $n_1$  and  $n_x$ , which doesn't require an ad-  
954 hoc determination of which singular values are notably larger than the others. Regardless of how  $n_1$  is determined,  
955 keeping the top  $n_1$  singular values from the SVD, we can extract  $\hat{X}_i^{(1)}$  as in equation (13). Note that in this stage,  
956 keeping of the top singular values ensures that the states that describe the behavior best (i.e. best approximate  $\hat{Z}_f$ )  
957 are prioritized.

958 Having decomposed  $\hat{Z}_f$  into  $\Gamma_{z_i}$  and  $\hat{X}_i^{(1)}$ , determining the model parameters from these matrices is straight  
 959 forward and there are multiple possible ways to accomplish this. We take an approach in the spirit of stochastic  
 960 algorithm 3 from ref. 33 in SID, and use the state matrix  $\hat{X}_i^{(1)}$  to estimate the model parameters. This method has  
 961 the advantage of guaranteeing that the estimated noise statistics are positive semi-definite, which is necessary for  
 962 the model to be physically meaningful<sup>33</sup>. We first compute the subspace for the latent states at the next time step  
 963 (having observed  $Y_i$  as defined in equation (5) in addition to  $Y_p$ , i.e. having observed the past  $i + 1$  samples) by  
 964 projecting  $Z_f^-$  onto  $Y_p^+$  (equation (8)). Similar to equation (57), this projection can be decomposed as

$$\hat{Z}_f^- = Z_f^- Y_p^{+T} (Y_p^+ Y_p^{+T})^{-1} Y_p^+ = \Gamma_{z_{i-1}} \Delta_{y_{i+1}}^c \Lambda_{y_{i+1}}^{-1} Y_p^+ = \Gamma_{z_{i-1}} \hat{X}_{i+1} \quad (60)$$

965 where  $\Gamma_{z_{i-1}}$ ,  $\Delta_{y_{i+1}}^c$  and  $\Lambda_{y_{i+1}}$  are defined similar to equations (55) and (50) and columns of  $\hat{X}_{i+1}$  are Kalman  
 966 estimates obtained using the past  $i + 1$  observations of  $y_k$  (from equation (56)). From the definition of  
 967 observability matrix, it is clear that  $\Gamma_{z_{i-1}}$  can be computed by removing the last block row of  $\Gamma_{z_i}$  (equation (12)).  
 968  $\hat{X}_{i+1}$  can then be computed (in the same basis as  $\hat{X}_i$ ) by multiplying both sides of equation (60) with  $\Gamma_{z_{i-1}}^\dagger$  from the  
 969 left (equation (13)). We then take columns of  $\hat{X}_{i+1}$  and  $\hat{X}_i$  as samples of the current state and the corresponding  
 970 next state (i.e.  $x_{k+1}^{(1)}$  and  $x_k^{(1)}$  from equation (4)) respectively, and based on equation (4), compute the least squares  
 971 estimate for  $A_{11}$  that is given in equation (14). This concludes the extraction of behaviorally relevant latent states  
 972 and the estimation of the segment of the state transition matrix  $A$  that is associated with these states (i.e.  $A_{11}$ ). In  
 973 the next stage of PSID, we extract the behaviorally irrelevant latent states (optional) and estimate the rest of the  $A$   
 974 matrix and all other model parameters using the extracted states to conclude the full derivation.

### 975 ***PSID, stage 2: extracting behaviorally irrelevant latent states***

976 So far we have extracted the behaviorally relevant latent states as the key first step toward learning the model  
 977 parameters. To find any remaining behaviorally irrelevant states, we need to find the variations in neural activity  
 978 that are not explained by the behaviorally relevant latent states. We thus first remove any variations in  $Y_f$  (and  $Y_f^-$ )  
 979 that lies in the subspace spanned by the extracted behaviorally relevant states  $\hat{X}_i^{(1)}$  (and  $\hat{X}_{i+1}^{(1)}$ ) ( $i$  is horizon as

980 defined previously), and then apply a procedure akin to the standard SID to the residual. The least squares  
981 solution for the best linear prediction of  $Y_f$  using  $\hat{X}_i^{(1)}$  is given by equation (15), and is termed  $\Gamma_{y_i}^{(1)}$ . This solution  
982 can be thought of as the neural observability matrix associated with the behaviorally relevant states  $\hat{X}_i^{(1)}$  (equation  
983 (58)). Thus, similar to equation (60), the associated observability matrix for  $\hat{X}_{i+1}^{(1)}$  can be computed by removing  
984 the last block row from the solution (equation (17)). We then subtract the best prediction of  $Y_f$  ( $Y_f^-$ ) using  $\hat{X}_i^{(1)}$   
985 ( $\hat{X}_{i+1}^{(1)}$ ) from it as shown in equation (16) (equation (18)), and call the result  $Y_f'$  ( $Y_f'^-$ ). In other words,  $Y_f'$  ( $Y_f'^-$ ) is  
986 the part of  $Y_f$  ( $Y_f^-$ ) that does not lie in the space spanned by  $\hat{X}_i^{(1)}$  ( $\hat{X}_{i+1}^{(1)}$ ). Given that  $\hat{X}_i^{(1)}$  and thus  $\Gamma_{y_i}^{(1)} \hat{X}_i^{(1)}$  (i.e. the  
987 linear prediction of  $Y_f$  using  $\hat{X}_i^{(1)}$ ) are of rank  $n_1$  and that  $\hat{Y}_f$  (i.e. the projection of  $Y_f$  onto  $Y_p$ ) is of rank  $n_x$   
988 (equation (58)), the projection of  $Y_f' = Y_f - \Gamma_{y_i}^{(1)} \hat{X}_i^{(1)}$  (i.e. residual future neural activity) onto  $Y_p$  will be of rank  
989  $n_2 = n_x - n_1$ . A similar procedure to what was applied to  $Z_f$  (and  $Z_f^-$ ) to find  $\hat{X}_i^{(1)}$  (and  $\hat{X}_{i+1}^{(1)}$ ) can be applied to  
990  $Y_f'$  (and  $Y_f'^-$ ) to extract the  $n_2$  remaining states  $\hat{X}_i^{(2)}$  (and  $\hat{X}_{i+1}^{(2)}$ ) (steps 11-14 from Table 1). Of note is that in this  
991 stage, keeping the top singular values after SVD (equation (21)) ensures that the remaining states that describe the  
992 unexplained neural activity best (i.e. best approximate  $\hat{Y}_f'$ ) are prioritized.

993 The above concludes the extraction of behaviorally irrelevant latent states. Concatenating the states extracted  
994 from both stages (i.e.  $\hat{X}_i^{(1)}$  and  $\hat{X}_i^{(2)}$  as well as  $\hat{X}_{i+1}^{(1)}$  and  $\hat{X}_{i+1}^{(2)}$ ) together as in equation (26) concludes the extraction  
995 of all latent states, including behaviorally relevant and irrelevant ones. Given the fully extracted latent states, we  
996 then follow a similar approach as was taken before for  $A_{11}$  (equation (14)), to find the least squares estimate for  
997  $A_{12}$  and  $A_{22}$  (equation (27)),  $C_y$  (equation (29)) and  $C_z$  (equation (30)). Finally, the residuals from the least  
998 squares solutions to equations (14), (27) and (29) provide estimated values for  $w_k$  and  $v_k$  at each time step and  
999 thus we compute the sample covariance of these residuals to find the noise covariance parameters (equation (32)).  
1000 This concludes the estimation of all model parameters.

1001 Finally, in addition to equation (30), another viable alternative for finding the parameter  $C_z$  is to learn it using  
1002 linear regression, which is the procedure needed for the standard SID to relate its extracted latent state to behavior  
1003 and we use in this paper for both SID and PSID. Since  $C_z$  is not involved in the Kalman filter recursions (first 2  
1004 rows of equation (44)), it does not have any effect on the estimation of latent states from  $y_k$  and it only affects the  
1005 later prediction of  $z_k$  from those latent states. Consequently, we can use the other identified parameters to apply  
1006 Kalman filter to the training  $y_k$  and estimate the latent states  $\hat{x}_{k+1|k}$  (equation (44)). We can then use linear  
1007 regression to find the  $C_z$  that minimizes the prediction of  $z_k$  using  $\hat{x}_{k+1|k}$  as

$$C_z = Z_k \hat{X}_{k+1|k}^\dagger \quad (61)$$

1008 where columns of  $Z_k$  contain  $z_k$  for different time steps and columns of  $\hat{X}_{k+1|k}$  contain the corresponding  $\hat{x}_{k+1|k}$   
1009 estimates for those time steps. The advantage of using this alternative estimation of  $C_z$  is that  $\hat{X}_{k+1|k}$  (used in  
1010 equation (61)) are more accurate estimates of the latent states obtained using all past observations whereas  $\hat{X}_i$   
1011 (used in equation (30)) are less accurate estimates obtained using only the past  $i$  observations.

## 1012 **Supplementary note 6: Standard SID as a special case of PSID and the asymptotic characteristics of** 1013 **PSID**

1014 As a review of the standard SID, we refer the reader to chapter 8 from ref. 51 and chapter 3 from ref. 33. For  
1015  $n_1 = 0$ , PSID (Table 1) reduces to the standard SID (specifically to stochastic algorithm 3 from ref. 33). This is  
1016 because if  $n_1 = 0$ , no behaviorally relevant states ( $\hat{X}_i^{(1)}$ ) will be extracted leaving all variation of  $Y_f$  to be identified  
1017 in stage 2 of PSID, which is similar to using standard SID. Thus, the extracted  $\hat{X}_i^{(2)}$  in this case will be the same as  
1018 the  $\hat{X}_i$  that is obtained from applying SID on  $y_k$ . So to compare PSID with SID, we simply use PSID with  $n_1 = 0$ .

1019 As a generalization of the abovementioned version of SID (i.e. stochastic algorithm 3 from ref. 33), PSID has  
1020 similar asymptotic characteristics. In some other variations of SID (for example in stochastic algorithm 2 from ref.  
1021 33 and in Algorithm A in section 8.7 from ref. 51), instead of applying SVD to  $\hat{Y}_f$ , SVD is applied to the empirical  
1022 cross-covariance  $\Sigma_{y_f y_p}$  to decompose it into  $\Gamma_{y_i}$  and  $\Delta_{y_i}^c$  (equation (58)), giving an estimation of these matrices



1023 which for  $j \rightarrow \infty$  is unbiased<sup>33</sup>. From this decomposition, model parameters  $A$ ,  $C_y$ , and  $G_y$  can then be extracted—  
1024  $C_y$  as the first block of  $\Gamma_{y_i}$ ,  $G_y$  as the last block of  $\Delta_{y_i}^c$ , and  $A$  with a least squares solution within blocks of  $\Gamma_{y_i}$  (for  
1025 details see the SID variants mentioned in the previous sentence). However, this approach cannot guarantee that  
1026 for finite data ( $j < \infty$ ) the identified  $A$ ,  $C_y$ , and  $G_y$  will be associated with a positive real covariance sequence (i.e.  
1027 Faurre's stochastic realization may have no solution)<sup>33</sup>. In the alternative approach taken by PSID (and its special  
1028 case, stochastic algorithms 3 from ref. 33),  $A$  and  $C_y$  are computed as least squares solution of forming equation  
1029 (2) with  $\hat{X}_i$  taken as the value of the latent state and  $G_y$  is identified later based on the residuals of the least squares  
1030 solution. This approach cannot guarantee an asymptotically unbiased estimate of  $G_y$  (unless  $i \rightarrow \infty$  in which case  
1031 Kalman estimates in equation (56) will be exact), but it guarantees that even for finite data ( $j < \infty$ ) the identified  
1032 parameters will be associated with a positive real covariance sequence<sup>33</sup>, which is essential for the model to be  
1033 physically meaningful<sup>33</sup>.

#### 1034 **Supplementary Note 7: Generating random model parameters for simulations**

1035 For a model with given  $n_x$  and  $n_1$ ,  $A$  was generated by first randomly generating its eigenvalues and then  
1036 generating a block diagonal real matrix with the randomly selected eigenvalues (using MATLAB's `cdf2rdf`  
1037 command). We drew the eigenvalues with uniform probability from across the complex unit circle and then  
1038 randomly selected  $n_1$  of the  $n_x$  to be later used as behaviorally relevant eigenvalues. As a technical detail, in both  
1039 the original random generation of eigenvalues and in selecting  $n_1$  of them for behavior we made sure eigenvalues  
1040 are either real valued or are in complex-conjugate pairs (as needed for models with real observations). To do this,  
1041 we first drew  $\lfloor \frac{n_x}{2} \rfloor$  points with uniform probability from across the complex unit circle and then added the  
1042 complex conjugate of each to the set of eigenvalues. If  $n_x$  was odd, we then drew an additional eigen value from  
1043 the unit circle and set its angle to 0 or  $\pi$ , whichever was closer. Finally, to randomly select  $n_1$  of the  $n_x$  eigenvalues  
1044 to be used as behaviorally relevant, we repeatedly permuted the values until the first  $n_1$  eigenvalues also formed a  
1045 set of complex conjugate pairs or real values.

1046 Next, we generated  $C_y \in \mathbb{R}^{n_y \times n_x}$  by drawing each element from standard normal distribution. We generated  
1047  $C_z \in \mathbb{R}^{n_z \times n_x}$  by drawing values from the standard normal distribution for the elements associated with the  
1048 behaviorally relevant eigenvalues of  $A$  (or equivalently for the dimensions of  $x_k$  that drive behavior) and setting  
1049 the other elements to 0 (see equation (4)).

1050 For noise statistics  $Q$ ,  $R$ , and  $S$ , we generated general random covariance matrices and applied random scaling  
1051 factors to them to get a wide range of relative variances for the state noise  $w_k$  and observation noise  $v_k$ . To do this,  
1052 we first generated a random square matrix  $\Omega$  of the size  $n_x + n_y$  by drawing elements from standard normal  
1053 distribution and computed  $L = \Omega\Omega^T$ , which is guaranteed to be symmetric and positive semi-definite. We next  
1054 selected random scaling factors for the state noise  $w_k$  and the observation noise  $v_k$  by independently selecting two  
1055 real numbers  $a_1, a_2$  with uniform probability from the range  $(-1, +1)$ . We then applied the following scaling to  
1056 matrix  $L$  to get the noise statistics as

$$\begin{bmatrix} Q & S \\ S^T & R \end{bmatrix} = \begin{bmatrix} 10^{a_1} I_{n_x} \\ 10^{a_2} I_{n_y} \end{bmatrix} L \begin{bmatrix} 10^{a_1} I_{n_x} & 10^{a_2} I_{n_y} \end{bmatrix} \quad (62)$$

1057 where  $I_n$  denotes the identity matrix of the size  $n$ . This is equivalent to scaling  $v_k$  by  $10^{a_1}$  and independently  
1058 scaling  $w_k$  by  $10^{a_2}$  and generates a wide range of state and observation noise statistics.

1059 Finally, to build a model for generating the independent behavior residual dynamics  $\epsilon_k$  (which can be a general  
1060 colored signal and is not assumed to be white), we generate another random dynamic linear SSM with  
1061 independently selected latent state dimension of  $1 \leq n'_x \leq 10$  and parameters generated as explained above for  
1062 the main model. We will refer to this model as the behavior residual dynamics model. To diversify the ratio of  
1063 behavior dynamics that are shared with neural activity (equation (36)) to the residual behavior dynamics (i.e.  $\epsilon_k$ ),  
1064 we draw a random number  $\alpha_3$  in the range  $(0, +2)$ . We then multiply the rows of the  $C_z$  parameter in the  
1065 behavior residual dynamics model with different scalar values such that for each behavior dimension  $m$ , the

1066 shared-to-residual ratio, defined as the ratio of the std of the term  $z_{k_1}^{(m)}$  (equation (36)) to the std of the term  $\epsilon_k^{(m)}$ ,  
1067 is equal to  $10^{\alpha_3}$ .
